# Supplementary material for: Integrative Transcriptomic and microRNAomic Profiling Reveals Immune Mechanism for the Resilience to Soybean Meal Stress in Fish Gut and Liver
Source: Front Physiol. 2018 Sep 10;9:1154. doi: 10.3389/fphys.2018.01154 (PMC6140834; doi:10.3389/fphys.2018.01154)
Supplement: Supplementary file 4 [file Table_4.XLSX]

## Sheet: gut 3w vs 0d up
Gene ID	immune Process	Immune gene categery	Blasted with NR	Blasted with SWISS PROT	State	readcount_gut_2	readcount_gut_1	log2FoldChange	pval	padj
CI01000006_07929484_07931926	adapters effectors and signal transducers	granzyme	>ref|XP_016365637.1| granzyme K-like [Sinocyclocheilus rhinocerous]	sp|P49864|GRAK_RAT Granzyme K OS=Rattus norvegicus GN=Gzmk PE=1 SV=1//1.18749e-38	UP	280.852	95.9642	1.5492	6.5324e-05	0.020956
CI01000259_00255679_00284563	antigen processing and regulators	HA1	>ref|XP_001919291.4| uncharacterized protein LOC563036 [Danio rerio]	sp|P01898|HA10_MOUSE H-2 class I histocompatibility antigen, Q10 alpha chain OS=Mus musculus GN=H2-Q10 PE=1 SV=3//3.63366e-07	UP	332.489	100.031	1.7329	6.5088e-05	0.020956
CI01000319_00784439_00788986	antigen processing and regulators	HA1	>ref|XP_016102560.1| zinc-alpha-2-glycoprotein-like, partial [Sinocyclocheilus grahami]	sp|Q9TNN7|1C05_HUMAN HLA class I histocompatibility antigen, Cw-5 alpha chain OS=Homo sapiens GN=HLA-C PE=1 SV=1//6.59981e-24	UP	136.138	43.2938	1.6528	8.0265e-05	0.023044
CI01000146_02413749_02415254	antigen processing and regulators	HA2	>ref|XP_016401323.1| H-2 class II histocompatibility antigen, I-E beta chain-like [Sinocyclocheilus rhinocerous]	sp|Q30134|2B18_HUMAN HLA class II histocompatibility antigen, DRB1-8 beta chain OS=Homo sapiens GN=HLA-DRB1 PE=1 SV=2//1.72179e-30	UP	1994.97	0.34336	12.504	4.5191e-06	0.0035064
CI01000397_00000817_00001976	antigen processing and regulators	HA2	>ref|XP_016307202.1| H-2 class II histocompatibility antigen, A-U alpha chain-like [Sinocyclocheilus anshuiensis]	sp|P20755|HA2P_RABIT RLA class II histocompatibility antigen, DP alpha-1 chain (Fragment) OS=Oryctolagus cuniculus PE=3 SV=1//8.64058e-28	UP	173.417	54.7515	1.6633	8.4405e-05	0.023278
CI01000319_05718732_05734284	antigen processing and regulators	MHC I	>gb|AHI12885.1| MHC class I antigen, partial [Ctenopharyngodon idella]	sp|Q95460|HMR1_HUMAN Major histocompatibility complex class I-related gene protein OS=Homo sapiens GN=MR1 PE=1 SV=1//3.63722e-52	UP	24284.2	0	Inf	4.7692e-09	1.326e-05
CI01000153_00000009_00001649	antigen processing and regulators	MHC I related	>ref|XP_016123010.1| major histocompatibility complex class I-related gene protein-like [Sinocyclocheilus grahami]	sp|Q95460|HMR1_HUMAN Major histocompatibility complex class I-related gene protein OS=Homo sapiens GN=MR1 PE=1 SV=1//2.03331e-12	UP	1281.33	59.6457	4.4251	4.1168e-26	1.3735e-21
CI01000146_02272881_02275284	antigen processing and regulators	MHC II	>gb|ABW37740.1| MHC class II alpha antigen [Ctenopharyngodon idella]	sp|P15981|HA2D_PIG SLA class II histocompatibility antigen, DQ haplotype D alpha chain OS=Sus scrofa PE=2 SV=1//8.41255e-20	UP	2789.57	0	Inf	6.925e-07	0.00085573
CI01000146_02278636_02311063	antigen processing and regulators	MHC II	>gb|AAA50044.1| MHC class II DA-beta-2*01, partial [Danio rerio]	sp|P04231|HB23_MOUSE H-2 class II histocompatibility antigen, E-S beta chain (Fragment) OS=Mus musculus GN=H2-Eb1 PE=1 SV=1//2.1927e-31	UP	1627.17	0.646603	11.297	5.6297e-06	0.0042689
CI01000020_04807118_04808453	antigen processing and regulators	microglobulin	>dbj|BAD51478.1| beta2-microglobulin [Ctenopharyngodon idella] dbj|BAD51479.1|	sp|Q04475|B2MG_DANRE Beta-2-microglobulin OS=Danio rerio GN=b2m PE=1 SV=1//1.0043e-61	UP	61198.6	20618.4	1.5696	9.198e-06	0.0057072
CI01000029_01526863_01527414	inflammatory cytokines and receptors	CCL	>ref|XP_016326222.1| C-C motif chemokine 13-like [Sinocyclocheilus anshuiensis]	sp|P49873|CCL8_PIG C-C motif chemokine 8 OS=Sus scrofa GN=CCL8 PE=3 SV=1//4.08058e-14	UP	1137.76	245.347	2.2133	1.3778e-05	0.0074141
CI01000082_00689066_00690051	inflammatory cytokines and receptors	CCL	>ref|XP_016395768.1| C-C motif chemokine 8-like isoform X2 [Sinocyclocheilus rhinocerous]	-//-	UP	602.318	179.028	1.7503	2.4829e-06	0.0023474
CI01000016_11330944_11334103	inflammatory cytokines and receptors	CCR	>ref|XP_016149407.1| C-C chemokine receptor type 5-like [Sinocyclocheilus grahami]	sp|Q8MJW8|CCR4_CANFA C-C chemokine receptor type 4 OS=Canis familiaris GN=CCR4 PE=2 SV=1//2.13604e-73	UP	126.586	31.9053	1.9883	6.6404e-06	0.004736
CI01000339_00214390_00215412	inflammatory cytokines and receptors	chemokine receptor	>ref|XP_016409371.1| chemokine-like receptor 1 [Sinocyclocheilus rhinocerous]	sp|P97468|CML1_MOUSE Chemokine-like receptor 1 OS=Mus musculus GN=Cmklr1 PE=1 SV=1//7.91539e-68	UP	104.595	22.0102	2.2486	2.2691e-06	0.0022941
CI01000339_00210534_00211598	inflammatory cytokines and receptors	chemokine receptor	>ref|XP_016351686.1| chemokine-like receptor 1 [Sinocyclocheilus anshuiensis]	sp|P97468|CML1_MOUSE Chemokine-like receptor 1 OS=Mus musculus GN=Cmklr1 PE=1 SV=1//1.19483e-75	UP	161.702	39.9125	2.0184	3.0365e-06	0.0025977
CI01000027_09076261_09076773	inflammatory cytokines and receptors	FAM	>ref|XP_016405551.1| protein FAM26D-like [Sinocyclocheilus rhinocerous]	-//-	UP	79.8187	16.2725	2.2943	7.2565e-06	0.0049409
CI01000027_09476738_09478257	inflammatory cytokines and receptors	FAM	>ref|XP_016357917.1| protein FAM26F-like [Sinocyclocheilus anshuiensis] ref|XP_016372268.1|	sp|Q561R8|FA26F_RAT Protein FAM26F OS=Rattus norvegicus GN=Fam26f PE=2 SV=1//1.38978e-80	UP	207.543	51.7442	2.0039	8.4879e-05	0.023278
CI01000027_10609852_10616902	inflammatory cytokines and receptors	FAM	>ref|NP_001071274.1| uncharacterized protein LOC777768 [Danio rerio] gb|AAI27403.1|	sp|Q96IP4|FA46A_HUMAN Protein FAM46A OS=Homo sapiens GN=FAM46A PE=1 SV=2//0	UP	841.212	262.88	1.6781	3.8952e-06	0.003249
CI01000072_03105419_03111226	inflammatory cytokines and receptors	FGF and related	>ref|XP_016149512.1| fibroblast growth factor receptor homolog 1-like [Sinocyclocheilus grahami]	sp|Q07407|FGFR1_DROME Fibroblast growth factor receptor homolog 1 OS=Drosophila melanogaster GN=htl PE=1 SV=3//1.62193e-16	UP	329.84	112.7	1.5493	6.9833e-05	0.021775
CI01101274_00000042_00002422	inflammatory cytokines and receptors	GVIN	>ref|XP_016379104.1| interferon-induced very large GTPase 1-like [Sinocyclocheilus rhinocerous]	sp|Q7Z2Y8|GVIN1_HUMAN Interferon-induced very large GTPase 1 OS=Homo sapiens GN=GVINP1 PE=2 SV=2//0	UP	55.3068	4.83794	3.515	2.3712e-05	0.01055
CI01067565_00000038_00000582	inflammatory cytokines and receptors	IFN induced proteins and relevant	>ref|XP_017207212.1| interferon-induced protein with tetratricopeptide repeats 1 [Danio rerio]	-//-	UP	39.4763	4.98072	2.9866	9.4082e-06	0.0057072
CI01000350_01289098_01292899	inflammatory cytokines and receptors	IIGP	>ref|XP_016307067.1| interferon-inducible GTPase 5-like [Sinocyclocheilus anshuiensis]	sp|Q6AYF9|IIGP5_RAT Interferon-inducible GTPase 5 OS=Rattus norvegicus GN=Irgc PE=2 SV=1//6.30613e-78	UP	56.8547	13.197	2.1071	0.00013561	0.03057
CI01000046_01246234_01251650	inflammatory cytokines and receptors	IL21R	>ref|XP_016361464.1| interleukin-21 receptor-like isoform X1 [Sinocyclocheilus anshuiensis]	sp|Q9JHX3|IL21R_MOUSE Interleukin-21 receptor OS=Mus musculus GN=Il21r PE=2 SV=1//4.53542e-18	UP	187.336	65.7104	1.5114	0.00022503	0.041711
CI01000013_04943413_04948991	inflammatory cytokines and receptors	IL34	>ref|XP_016338803.1| interleukin-34-like isoform X2 [Sinocyclocheilus anshuiensis]	sp|Q6ZMJ4|IL34_HUMAN Interleukin-34 OS=Homo sapiens GN=IL34 PE=1 SV=1//2.85584e-20	UP	805.943	313.295	1.3632	0.00015217	0.032755
CI01000006_06267132_06269409	inflammatory cytokines and receptors	IL7R	>gb|KTG06967.1| hypothetical protein cypCar_00004380 [Cyprinus carpio]	sp|P16872|IL7RA_MOUSE Interleukin-7 receptor subunit alpha OS=Mus musculus GN=Il7r PE=1 SV=2//1.0004e-09	UP	851.391	292.551	1.5411	2.4347e-05	0.01055
CI01000037_04221676_04227105	other genes related to immune response	CD200	>ref|XP_016360675.1| cell surface glycoprotein CD200 receptor 1-like [Sinocyclocheilus anshuiensis] ref|XP_016360679.1|	-//-	UP	118.495	26.7804	2.1456	2.5665e-06	0.0023474
CI01000306_01859514_01870761	other genes related to immune response	GIAMP	>ref|XP_016373838.1| GTPase IMAP family member 8-like [Sinocyclocheilus rhinocerous]	sp|Q8ND71|GIMA8_HUMAN GTPase IMAP family member 8 OS=Homo sapiens GN=GIMAP8 PE=2 SV=2//1.7245e-10	UP	268.053	62.0132	2.1119	1.9979e-07	0.00031742
CI01000291_00020500_00030047	other genes related to immune response	GIAMP	>ref|XP_016334868.1| GTPase IMAP family member 7-like, partial [Sinocyclocheilus anshuiensis]	sp|Q8NHV1|GIMA7_HUMAN GTPase IMAP family member 7 OS=Homo sapiens GN=GIMAP7 PE=1 SV=1//1.39371e-28	UP	166.401	43.2644	1.9434	6.8135e-06	0.004736
CI01000310_03152976_03154047	other genes related to immune response	NK-lysin	>ref|XP_016401610.1| antimicrobial peptide NK-lysin-like [Sinocyclocheilus rhinocerous]	sp|O13035|SAP_CHICK Proactivator polypeptide OS=Gallus gallus GN=PSAP PE=1 SV=1//5.64086e-07	UP	868.941	252.879	1.7808	5.2968e-05	0.0188
CI01000146_01118482_01121194	other genes related to immune response	ubiquitin ligase	>ref|XP_016105817.1| E3 ubiquitin-protein ligase NEURL3-like [Sinocyclocheilus grahami]	sp|Q5M870|NEUL3_RAT E3 ubiquitin-protein ligase NEURL3 OS=Rattus norvegicus GN=Neurl3 PE=2 SV=1//7.12702e-32	UP	316.96	89.5171	1.8241	4.3037e-06	0.0035022
CI01000319_03402932_03447997	other genes related to immune response	ubiquitin ligase	>ref|XP_010748987.1| pyrin-like [Larimichthys crocea]	sp|P19474|RO52_HUMAN E3 ubiquitin-protein ligase TRIM21 OS=Homo sapiens GN=TRIM21 PE=1 SV=1//3.87618e-12	UP	346.252	127.345	1.4431	0.00025946	0.047047
CI01000299_00082987_00089134	T/B cell antigen activation	CD2	>ref|XP_016396732.1| T-cell surface antigen CD2-like isoform X2 [Sinocyclocheilus rhinocerous]	-//-	UP	679.035	202.693	1.7442	2.4274e-05	0.01055
CI01000018_01286376_01296170	T/B cell antigen activation	CD226	>ref|XP_016392740.1| CD226 antigen-like [Sinocyclocheilus rhinocerous]	sp|Q8K4F0|CD226_MOUSE CD226 antigen OS=Mus musculus GN=Cd226 PE=2 SV=1//1.34905e-22	UP	292.81	93.5333	1.6464	0.00015988	0.033976
CI01000230_00202507_00204462	T/B cell antigen activation	CD3	>ref|XP_016327606.1| T-cell surface glycoprotein CD3 epsilon chain-like [Sinocyclocheilus anshuiensis]	sp|Q98910|CD3E_CHICK T-cell surface glycoprotein CD3 epsilon chain OS=Gallus gallus GN=CD3E PE=2 SV=1//1.67366e-14	UP	836.45	291.427	1.5211	3.1663e-05	0.012899
CI01000230_00209508_00212576	T/B cell antigen activation	CD3	>ref|XP_016096612.1| T-cell surface glycoprotein CD3 delta chain-like [Sinocyclocheilus grahami]	-//-	UP	477.021	176.039	1.4382	0.00014241	0.031403
CI01000049_07671905_07677035	T/B cell antigen activation	CD5	>ref|XP_016095142.1| T-cell surface glycoprotein CD5-like [Sinocyclocheilus grahami]	sp|P06127|CD5_HUMAN T-cell surface glycoprotein CD5 OS=Homo sapiens GN=CD5 PE=1 SV=2//5.99013e-07	UP	242.314	82.2191	1.5593	0.00010659	0.02615
CI01000325_01288072_01307450	T/B cell antigen activation	PKC	>ref|XP_016353502.1| protein kinase C eta type-like [Sinocyclocheilus anshuiensis]	sp|P24723|KPCL_HUMAN Protein kinase C eta type OS=Homo sapiens GN=PRKCH PE=1 SV=4//8.42179e-25	UP	267.47	72.6875	1.8796	6.2885e-06	0.0046625
CI01000004_01069526_01076799	T/B cell antigen activation	RGS	>ref|XP_016377142.1| regulator of G-protein signaling 21-like isoform X1 [Sinocyclocheilus rhinocerous]	sp|Q9NS28|RGS18_HUMAN Regulator of G-protein signaling 18 OS=Homo sapiens GN=RGS18 PE=1 SV=1//1.29692e-53	UP	375.991	120.453	1.6422	8.3643e-05	0.023278
CI01026439_00000230_00000610	T/B cell antigen activation	TCR	>gb|AGW43287.1| T cell receptor beta chain, partial [Ctenopharyngodon idella]	sp|P06333|TCB1_RABIT T-cell receptor beta chain C region OS=Oryctolagus cuniculus PE=2 SV=2//1.37992e-14	UP	646.355	150.756	2.1001	6.6221e-08	0.00013659
CI01000015_07267301_07270659	T/B cell antigen activation	VTCN	>ref|XP_016362960.1| CXADR-like membrane protein [Sinocyclocheilus anshuiensis]	sp|Q7Z7D3|VTCN1_HUMAN V-set domain-containing T-cell activation inhibitor 1 OS=Homo sapiens GN=VTCN1 PE=1 SV=1//2.90267e-10	UP	20.7197	1.81946	3.5094	0.00027114	0.048376

## Sheet: gut 3w vs 0d down
Gene ID	immune Process	Immune gene categery	Blasted with NR	Blasted with SWISS PROT	State	readcount_gut_2	readcount_gut_1	log2FoldChange	pval	padj
CI01000009_02358636_02361913	acute phase reactions	hemopexin	>ref|XP_016344330.1| hemopexin isoform X1 [Sinocyclocheilus anshuiensis]	sp|Q6PHG2|HEMO_DANRE Hemopexin OS=Danio rerio GN=hpx PE=2 SV=2//0	DOWN	29.5989	855.738	-4.8536	9.4609e-05	0.024855
CI01000028_00291055_00310156	antigen processing and regulators	TGF, TGF receptor and related	>ref|XP_017207561.1| latent-transforming growth factor beta-binding protein 4 [Danio rerio]	sp|Q8N2S1|LTBP4_HUMAN Latent-transforming growth factor beta-binding protein 4 OS=Homo sapiens GN=LTBP4 PE=1 SV=2//1.54325e-06	DOWN	787.692	2120.88	-1.429	6.96e-05	0.021775
CI01180000_00390297_00422803	inflammatory cytokines and receptors	integrin alpha	>ref|XP_016400389.1| integrin alpha-9 [Sinocyclocheilus rhinocerous]	sp|Q13797|ITA9_HUMAN Integrin alpha-9 OS=Homo sapiens GN=ITGA9 PE=1 SV=2//0	DOWN	154.002	420.433	-1.4489	9.3767e-05	0.024829
CI01180000_00455918_00461072	inflammatory cytokines and receptors	integrin alpha	>ref|XP_016115654.1| integrin alpha-9-like [Sinocyclocheilus grahami]	sp|B8JK39|ITA9_MOUSE Integrin alpha-9 OS=Mus musculus GN=Itga9 PE=1 SV=1//1.98736e-89	DOWN	76.6199	211.015	-1.4616	0.00021491	0.04074
CI01000082_04619826_04620686	other genes related to immune response	CEBP	>ref|XP_016092738.1| CCAAT/enhancer-binding protein delta-like [Sinocyclocheilus grahami]	sp|P49716|CEBPD_HUMAN CCAAT/enhancer-binding protein delta OS=Homo sapiens GN=CEBPD PE=1 SV=2//1.63198e-58	DOWN	2466.4	10489.8	-2.0885	0.00013225	0.030221
CI01000190_01359186_01367853	other genes related to immune response	GIAMP	>gb|KTF73530.1| hypothetical protein cypCar_00029544 [Cyprinus carpio]	sp|Q8K3K9|GIMA4_RAT GTPase IMAP family member 4 OS=Rattus norvegicus GN=Gimap4 PE=2 SV=1//1.23318e-15	DOWN	493.963	1299.42	-1.3954	9.9687e-05	0.025229
CI01000301_00136561_00171689	other genes related to immune response	lymphocyte related	>ref|NP_571501.1| lymphoid enhancer-binding factor 1 [Danio rerio] gb|AAD41489.1|AF136454_1 lymphocyte enhancer binding factor 1 Lef1	sp|Q9UJU2|LEF1_HUMAN Lymphoid enhancer-binding factor 1 OS=Homo sapiens GN=LEF1 PE=1 SV=1//0	DOWN	19.3272	78.7484	-2.0266	0.00012913	0.029893
CI01000027_08033124_08037571	other genes related to immune response	myeloid cell related	>ref|XP_016410008.1| induced myeloid leukemia cell differentiation protein Mcl-1 homolog [Sinocyclocheilus rhinocerous]	sp|Q8HYS5|MCL1_CANFA Induced myeloid leukemia cell differentiation protein Mcl-1 homolog OS=Canis familiaris GN=MCL1 PE=2 SV=1//6.82704e-24	DOWN	1769.62	4792.25	-1.4373	3.846e-05	0.014788
CI01000012_11799629_11846842	T/B cell antigen activation	BCL	>ref|XP_016313257.1| B-cell lymphoma/leukemia 11A-like [Sinocyclocheilus anshuiensis]	sp|Q9H165|BC11A_HUMAN B-cell lymphoma/leukemia 11A OS=Homo sapiens GN=BCL11A PE=1 SV=2//0	DOWN	19.4931	116.598	-2.5805	0.00012393	0.029324
CI01026444_00000065_00000635	T/B cell antigen activation	TCR	>gb|AGW43287.1| T cell receptor beta chain, partial [Ctenopharyngodon idella]	sp|A0A5B9|TRBC2_HUMAN T-cell receptor beta-2 chain C region OS=Homo sapiens GN=TRBC2 PE=1 SV=1//1.2551e-16	DOWN	0	85.597	#NAME?	0.0001714	0.035519
CI01000010_00952202_00958971	T/B cell antigen activation	TYK2	>ref|XP_016315286.1| protein-tyrosine kinase 6-like [Sinocyclocheilus anshuiensis]	sp|Q13882|PTK6_HUMAN Protein-tyrosine kinase 6 OS=Homo sapiens GN=PTK6 PE=1 SV=1//2.67387e-138	DOWN	47.3744	151.421	-1.6764	6.5244e-05	0.020956

## Sheet: gut 5w vs 3w up
Gene ID	immune Process	Immune gene categery	Blasted with NR	Blasted with SWISS PROT	State	readcount_gut_2	readcount_gut_1	log2FoldChange	pval	padj
CI01000300_10370185_10373703	acute phase reactions	fibrinogen	>gb|ADF97606.1| fibrinogen gamma polypeptide [Hypophthalmichthys molitrix]	sp|P02679|FIBG_HUMAN Fibrinogen gamma chain OS=Homo sapiens GN=FGG PE=1 SV=3//7.31785e-155	UP	1124.13	6.38554	7.4598	1.0022e-13	5.6622e-11
CI01000300_01384469_01386368	acute phase reactions	fibrinogen	>ref|XP_016432191.1| fibrinogen alpha chain-like [Sinocyclocheilus rhinocerous]	sp|P14448|FIBA_CHICK Fibrinogen alpha chain OS=Gallus gallus GN=FGA PE=1 SV=4//1.10355e-11	UP	1394.85	9.38171	7.216	1.1717e-13	6.5116e-11
CI01000300_01373306_01377544	acute phase reactions	fibrinogen	>ref|XP_016347281.1| fibrinogen beta chain-like [Sinocyclocheilus anshuiensis]	sp|P02675|FIBB_HUMAN Fibrinogen beta chain OS=Homo sapiens GN=FGB PE=1 SV=2//0	UP	1399.81	11.7244	6.8996	8.465e-12	3.4573e-09
CI01000300_01387744_01388660	acute phase reactions	fibrinogen	>ref|XP_016375380.1| fibrinogen alpha chain-like [Sinocyclocheilus rhinocerous]	sp|P02672|FIBA_BOVIN Fibrinogen alpha chain OS=Bos taurus GN=FGA PE=1 SV=5//5.75406e-23	UP	222.548	2.13077	6.7066	1.8679e-11	7.1952e-09
CI01000053_00019833_00041450	acute phase reactions	macroglobulin	>ref|XP_016308401.1| alpha-2-macroglobulin-like isoform X2 [Sinocyclocheilus anshuiensis]	sp|P28666|MUG2_MOUSE Murinoglobulin-2 OS=Mus musculus GN=Mug2 PE=2 SV=2//0	UP	46.5049	2.03078	4.5173	1.271e-09	3.5028e-07
CI01000191_00810914_00830686	acute phase reactions	macroglobulin	>dbj|BAA85038.1| alpha-2-macroglobulin-1 [Cyprinus carpio]	sp|P06238|A2MG_RAT Alpha-2-macroglobulin OS=Rattus norvegicus GN=A2m PE=2 SV=2//0	UP	152.724	7.59253	4.3302	4.6325e-15	3.0199e-12
CI01000072_04648326_04662198	acute phase reactions	macroglobulin	>dbj|BAA85038.1| alpha-2-macroglobulin-1 [Cyprinus carpio]	sp|Q5R4N8|A2MG_PONAB Alpha-2-macroglobulin OS=Pongo abelii GN=A2M PE=2 SV=1//2.21447e-179	UP	195.244	11.2448	4.1179	2.221e-15	1.5058e-12
CI01000072_04665875_04678048	acute phase reactions	macroglobulin	>dbj|BAA85038.1| alpha-2-macroglobulin-1 [Cyprinus carpio]	sp|Q5R4N8|A2MG_PONAB Alpha-2-macroglobulin OS=Pongo abelii GN=A2M PE=2 SV=1//3.92169e-29	UP	63.1079	4.91341	3.683	3.1232e-05	0.0027009
CI01000029_03746973_03752660	acute phase reactions	plasminogen	>ref|XP_016329762.1| plasminogen-like [Sinocyclocheilus anshuiensis]	sp|Q01177|PLMN_RAT Plasminogen OS=Rattus norvegicus GN=Plg PE=2 SV=2//1.30101e-09	UP	123.994	2.06724	5.9064	1.89e-21	2.494e-18
CI01000012_05565127_05567009	adapters effectors and signal transducers	CD276	>ref|XP_016407631.1| programmed cell death 1 ligand 1-like [Sinocyclocheilus rhinocerous]	sp|Q5ZPR3|CD276_HUMAN CD276 antigen OS=Homo sapiens GN=CD276 PE=1 SV=1//2.262e-17	UP	1483.58	184.5	3.0074	2.3657e-07	3.9119e-05
CI01000030_06940324_06983295	adapters effectors and signal transducers	CD276	>ref|XP_016420279.1| uncharacterized protein LOC107749630 [Sinocyclocheilus rhinocerous]	sp|Q68EV1|CD276_XENLA CD276 antigen homolog OS=Xenopus laevis GN=cd276 PE=2 SV=1//3.158e-08	UP	75.8934	17.0101	2.1576	1.5396e-05	0.001466
CI01000340_10252718_10253859	adapters effectors and signal transducers	CIS	>gb|ADC54227.1| cytokine-inducible Src homology 2 [Ctenopharyngodon idella]	sp|Q9PW70|CISH_CHICK Cytokine-inducible SH2-containing protein OS=Gallus gallus GN=CISH PE=2 SV=1//2.27282e-47	UP	2479.82	733.37	1.7576	7.1751e-06	0.0007897
CI01000090_01036633_01042172	adapters effectors and signal transducers	Lysosomal protein	>ref|XP_016299408.1| lysosomal acid phosphatase-like isoform X1 [Sinocyclocheilus anshuiensis]	sp|P20611|PPAL_RAT Lysosomal acid phosphatase OS=Rattus norvegicus GN=Acp2 PE=1 SV=1//2.08878e-141	UP	32.1442	1.01539	4.9845	4.7663e-08	9.3395e-06
CI01000051_04155754_04157992	adapters effectors and signal transducers	NFKBI and related	>gb|AHV91026.1| IkBa [Ctenopharyngodon idella]	sp|Q08353|IKBA_PIG NF-kappa-B inhibitor alpha OS=Sus scrofa GN=NFKBIA PE=2 SV=1//1.69507e-91	UP	4312.56	1440.03	1.5824	8.51e-06	0.00092166
CI01000299_06516832_06521405	adapters effectors and signal transducers	NFKBI and related	>ref|XP_016308242.1| NF-kappa-B inhibitor zeta-like [Sinocyclocheilus anshuiensis]	sp|Q9BE45|IKBZ_BOVIN NF-kappa-B inhibitor zeta OS=Bos taurus GN=NFKBIZ PE=2 SV=2//2.70601e-127	UP	1327.6	576.884	1.2025	0.00024278	0.015269
CI01027133_00001270_00003645	adapters effectors and signal transducers	NLRC3	>ref|XP_016308250.1| protein NLRC3-like [Sinocyclocheilus anshuiensis]	sp|Q7RTR2|NLRC3_HUMAN Protein NLRC3 OS=Homo sapiens GN=NLRC3 PE=2 SV=2//5.20426e-25	UP	260.616	7.93927	5.0368	5.0402e-13	2.549e-10
CI01000356_00236990_00260174	adapters effectors and signal transducers	NLRC3	>ref|XP_016108043.1| NACHT, LRR and PYD domains-containing protein 3-like [Sinocyclocheilus grahami]	sp|Q7RTR2|NLRC3_HUMAN Protein NLRC3 OS=Homo sapiens GN=NLRC3 PE=2 SV=2//2.77674e-62	UP	95.5753	10.4668	3.1908	9.3763e-06	0.00098404
CI01000112_02774549_02777028	adapters effectors and signal transducers	SOCS (1-7)	>gb|ACC85669.1| suppressor of cytokine signalling 3 [Ctenopharyngodon idella] gb|ACD82060.1|	sp|O88583|SOCS3_RAT Suppressor of cytokine signaling 3 OS=Rattus norvegicus GN=Socs3 PE=1 SV=1//5.79145e-80	UP	6919.05	1073.16	2.6887	5.291e-15	3.3841e-12
CI01000069_00403871_00404476	adapters effectors and signal transducers	SOCS (1-7)	>gb|ADA60714.1| suppressor of cytokine signaling 1 [Ctenopharyngodon idella]	sp|O15524|SOCS1_HUMAN Suppressor of cytokine signaling 1 OS=Homo sapiens GN=SOCS1 PE=1 SV=1//3.7292e-55	UP	1298.49	304.195	2.0938	0.00024644	0.015442
CI01000319_06316911_06319511	antigen processing and regulators	CDK and related	>ref|XP_016425151.1| cyclin-dependent kinases regulatory subunit 1 [Sinocyclocheilus rhinocerous] ref|XP_016396112.1|	sp|P61025|CKS1_MOUSE Cyclin-dependent kinases regulatory subunit 1 OS=Mus musculus GN=Cks1b PE=3 SV=1//5.60246e-36	UP	66.6847	0.34836	7.5806	4.5021e-11	1.5734e-08
CI01000186_00422121_00422913	antigen processing and regulators	CDK and related	>ref|XP_003200962.1| cyclin-dependent kinase inhibitor 1 isoform X1 [Danio rerio]	sp|O19002|CDN1A_FELCA Cyclin-dependent kinase inhibitor 1 OS=Felis catus GN=CDKN1A PE=2 SV=3//1.13973e-16	UP	1339.57	85.661	3.967	1.2114e-08	2.6666e-06
CI01000130_00769102_00770264	antigen processing and regulators	CDK and related	>ref|XP_016364954.1| cyclin-dependent kinase 4 inhibitor D [Sinocyclocheilus rhinocerous] ref|XP_016364955.1|	sp|Q29RV0|CDN2D_BOVIN Cyclin-dependent kinase 4 inhibitor D OS=Bos taurus GN=CDKN2D PE=2 SV=1//2.65151e-49	UP	73.8052	19.7224	1.9039	0.00013099	0.0090624
CI01000326_00524269_00538874	antigen processing and regulators	CDK and related	>ref|XP_016296125.1| cyclin-dependent kinase 13-like isoform X1 [Sinocyclocheilus anshuiensis]	sp|Q69ZA1|CDK13_MOUSE Cyclin-dependent kinase 13 OS=Mus musculus GN=Cdk13 PE=1 SV=3//0	UP	1387.41	535.368	1.3738	4.3944e-05	0.0035569
CI01000018_04563971_04573228	antigen processing and regulators	CDK and related	>ref|NP_919389.2| cyclin-dependent kinase 8 [Danio rerio] ref|XP_016378331.1|	sp|Q8JH47|CDK8_DANRE Cyclin-dependent kinase 8 OS=Danio rerio GN=cdk8 PE=2 SV=1//0	UP	512.952	225.593	1.1851	0.00083455	0.040247
CI01000142_00224121_00249873	complement system	C1q	>gb|KTF73815.1| hypothetical protein cypCar_00044821 [Cyprinus carpio]	sp|Q4ZJM9|C1QL4_MOUSE Complement C1q-like protein 4 OS=Mus musculus GN=C1ql4 PE=1 SV=1//1.65991e-07	UP	37.2465	0	Inf	8.5583e-05	0.0063762
CI01000304_09529802_09531061	complement system	C1q	>ref|XP_016383808.1| complement C1q-like protein 4 [Sinocyclocheilus rhinocerous]	sp|Q7Z5L3|C1QL2_HUMAN Complement C1q-like protein 2 OS=Homo sapiens GN=C1QL2 PE=2 SV=2//4.06311e-08	UP	15.0385	0	Inf	1.3688e-05	0.0013258
CI01000350_01268618_01269611	complement system	C1q	>gb|KTG37462.1| hypothetical protein cypCar_00031512 [Cyprinus carpio]	sp|Q4ZJM9|C1QL4_MOUSE Complement C1q-like protein 4 OS=Mus musculus GN=C1ql4 PE=1 SV=1//5.21397e-17	UP	149.217	0.710257	7.7149	3.5272e-06	0.00042856
CI01000027_09103562_09122837	complement system	C1r	>ref|XP_016389319.1| complement C1r-A subcomponent-like [Sinocyclocheilus rhinocerous]	sp|Q8CG16|C1RA_MOUSE Complement C1r-A subcomponent OS=Mus musculus GN=C1ra PE=1 SV=1//6.03693e-13	UP	84.6061	19.7393	2.0997	8.7555e-06	0.00093334
CI01000181_00330804_00357644	complement system	C3	>gb|AAQ74974.1| complement C3 [Ctenopharyngodon idella]	sp|P98093|CO3_ONCMY Complement C3 (Fragment) OS=Oncorhynchus mykiss GN=c3 PE=1 SV=1//1.86581e-23	UP	1145.42	16.2343	6.1407	2.6871e-45	3.0363e-41
CI01158956_00000114_00000473	complement system	C3	>gb|AAQ74974.1| complement C3 [Ctenopharyngodon idella]	sp|P98093|CO3_ONCMY Complement C3 (Fragment) OS=Oncorhynchus mykiss GN=c3 PE=1 SV=1//1.46412e-26	UP	82.8648	1.26375	6.035	4.5848e-17	3.7005e-14
CI01004566_00000214_00000565	complement system	C3	>gb|AAQ74974.1| complement C3 [Ctenopharyngodon idella]	sp|P98093|CO3_ONCMY Complement C3 (Fragment) OS=Oncorhynchus mykiss GN=c3 PE=1 SV=1//8.25009e-19	UP	97.0287	2.33591	5.3764	2.2943e-17	1.9942e-14
CI01158989_00000008_00000864	complement system	C3	>gb|AAQ74974.1| complement C3 [Ctenopharyngodon idella]	sp|P98093|CO3_ONCMY Complement C3 (Fragment) OS=Oncorhynchus mykiss GN=c3 PE=1 SV=1//2.05438e-59	UP	141.525	4.1167	5.1034	6.7198e-20	7.1186e-17
CI01000030_06405632_06428709	complement system	C3	>ref|XP_016386615.1| complement C3-like [Sinocyclocheilus rhinocerous]	sp|P98093|CO3_ONCMY Complement C3 (Fragment) OS=Oncorhynchus mykiss GN=c3 PE=1 SV=1//1.70875e-87	UP	399.336	56.4377	2.8229	3.1215e-13	1.6534e-10
CI01000080_02810515_02831498	complement system	C5	>ref|XP_016341831.1| complement C5 [Sinocyclocheilus anshuiensis]	sp|P01031|CO5_HUMAN Complement C5 OS=Homo sapiens GN=C5 PE=1 SV=4//0	UP	122.91	23.5999	2.3808	7.1721e-08	1.3359e-05
CI01000006_07223113_07228278	complement system	C7	>gb|AEQ53931.1| complement component C7 [Ctenopharyngodon idella] gb|AFN20333.1|	sp|Q29RQ1|CO7_BOVIN Complement component C7 OS=Bos taurus GN=C7 PE=2 SV=1//0	UP	87.4572	21.5065	2.0238	1.6402e-05	0.0015407
CI01000098_02447543_02468822	complement system	C8	>ref|XP_016348521.1| complement component C8 alpha chain [Sinocyclocheilus anshuiensis]	sp|P07357|CO8A_HUMAN Complement component C8 alpha chain OS=Homo sapiens GN=C8A PE=1 SV=2//1.16619e-89	UP	21.0048	0.610262	5.1051	7.1361e-06	0.00078797
CI01000098_02473023_02489273	complement system	C8	>ref|XP_016363766.1| complement component C8 beta chain [Sinocyclocheilus rhinocerous]	sp|Q90X85|CO8B_ONCMY Complement component C8 beta chain OS=Oncorhynchus mykiss GN=c8b PE=2 SV=1//0	UP	22.5831	1.41375	3.9977	2.1515e-05	0.0019449
CI01000339_06995644_07004684	complement system	C9	>gb|ABN49522.1| complement component C9 [Ctenopharyngodon idella] gb|AAS76086.2|	sp|P06682|CO9_ONCMY Complement component C9 (Fragment) OS=Oncorhynchus mykiss GN=c9 PE=2 SV=2//7.78233e-172	UP	95.9177	3.51744	4.7692	9.0829e-16	6.5511e-13
CI01000006_03270739_03288631	complement system	CFB	>ref|XP_016377011.1| complement factor B-like [Sinocyclocheilus rhinocerous]	sp|P81187|CFAB_BOVIN Complement factor B OS=Bos taurus GN=CFB PE=1 SV=2//6.66609e-163	UP	722.515	50.6896	3.8333	2.5997e-23	4.1965e-20
CI01150997_00000056_00000242	complement system	CFI	>gb|ADN22949.1| complement factor I [Ctenopharyngodon idella]	sp|P05156|CFAI_HUMAN Complement factor I OS=Homo sapiens GN=CFI PE=1 SV=2//1.19617e-13	UP	43.6785	4.37607	3.3192	7.2269e-07	0.00010792
CI01000129_01621350_01641606	complement system	CFI	>gb|ADN22949.1| complement factor I [Ctenopharyngodon idella]	sp|Q61129|CFAI_MOUSE Complement factor I OS=Mus musculus GN=Cfi PE=1 SV=3//5.35989e-12	UP	95.7102	15.2886	2.6462	6.8719e-08	1.287e-05
CI01000001_11265638_11283027	complement system	MASP	>ref|XP_016333875.1| mannan-binding lectin serine protease 2 isoform X1 [Sinocyclocheilus anshuiensis] ref|XP_016333876.1|	sp|O00187|MASP2_HUMAN Mannan-binding lectin serine protease 2 OS=Homo sapiens GN=MASP2 PE=1 SV=4//0	UP	59.6731	1.98078	4.9129	4.9409e-12	2.0936e-09
CI01000004_12390372_12391923	inflammatory cytokines and receptors	CCR	>ref|XP_016120670.1| C-C chemokine receptor type 9-like [Sinocyclocheilus grahami]	sp|Q9WUT7|CCR9_MOUSE C-C chemokine receptor type 9 OS=Mus musculus GN=Ccr9 PE=2 SV=1//3.1621e-100	UP	3163.26	1064.47	1.5713	2.4874e-06	0.00031463
CI01000353_01135934_01142509	inflammatory cytokines and receptors	CFLAR	>ref|XP_016424078.1| CASP8 and FADD-like apoptosis regulator isoform X1 [Sinocyclocheilus rhinocerous]	sp|O35732|CFLAR_MOUSE CASP8 and FADD-like apoptosis regulator OS=Mus musculus GN=Cflar PE=2 SV=2//6.31272e-79	UP	185.405	49.5463	1.9038	2.2578e-06	0.00029213
CI01000036_00947110_00948159	inflammatory cytokines and receptors	CXCR	>gb|AFK29470.1| chemokine (C-X-C motif), receptor 4b [Megalobrama amblycephala]	sp|P61072|CXCR4_PANTR C-X-C chemokine receptor type 4 OS=Pan troglodytes GN=CXCR4 PE=2 SV=1//2.43942e-112	UP	2575.07	451.859	2.5107	2.6016e-09	6.7839e-07
CI01000185_00004801_00013583	inflammatory cytokines and receptors	EGF,EGFR and related	>ref|XP_016308420.1| epidermal growth factor receptor kinase substrate 8-like protein 3 [Sinocyclocheilus anshuiensis]	sp|Q91WL0|ES8L3_MOUSE Epidermal growth factor receptor kinase substrate 8-like protein 3 OS=Mus musculus GN=Eps8l3 PE=2 SV=1//3.47723e-97	UP	4322.53	2071.44	1.0612	0.0010237	0.047231
CI01156787_00000823_00002026	inflammatory cytokines and receptors	FAM	>ref|XP_016381179.1| protein FAM173A [Sinocyclocheilus rhinocerous] ref|XP_016381180.1|	sp|Q9BQD7|F173A_HUMAN Protein FAM173A OS=Homo sapiens GN=FAM173A PE=2 SV=1//2.05464e-49	UP	119.003	29.7535	1.9999	5.7069e-06	0.00064271
CI01000027_05769594_05773182	inflammatory cytokines and receptors	FAM	>ref|XP_016387460.1| protein FAM84B-like [Sinocyclocheilus rhinocerous]	sp|Q96KN1|FA84B_HUMAN Protein FAM84B OS=Homo sapiens GN=FAM84B PE=1 SV=1//1.69915e-114	UP	2315.16	686.898	1.7529	6.6769e-05	0.0051558
CI01156881_00000520_00001209	inflammatory cytokines and receptors	FAM	>ref|NP_001002083.1| protein FAM173A [Danio rerio] gb|AAH71549.1|	-//-	UP	113.303	35.662	1.6677	0.00012491	0.0087339
CI01000300_08590592_08591221	inflammatory cytokines and receptors	FGF and related	>ref|XP_016369441.1| fibroblast growth factor-binding protein 1-like [Sinocyclocheilus rhinocerous]	sp|Q9QY10|FGFP1_RAT Fibroblast growth factor-binding protein 1 OS=Rattus norvegicus GN=Fgfbp1 PE=1 SV=1//8.87322e-17	UP	684.435	156.726	2.1267	2.0618e-06	0.00027091
CI01006752_00000005_00000659	inflammatory cytokines and receptors	GVIN	>ref|XP_016308537.1| interferon-induced very large GTPase 1-like [Sinocyclocheilus anshuiensis]	sp|Q7Z2Y8|GVIN1_HUMAN Interferon-induced very large GTPase 1 OS=Homo sapiens GN=GVINP1 PE=2 SV=2//1.48058e-23	UP	77.0311	0	Inf	9.6961e-06	0.0010007
CI01108785_00000094_00000436	inflammatory cytokines and receptors	GVIN	>ref|XP_005755313.1| interferon-induced very large GTPase 1-like, partial [Pundamilia nyererei]	sp|Q7Z2Y8|GVIN1_HUMAN Interferon-induced very large GTPase 1 OS=Homo sapiens GN=GVINP1 PE=2 SV=2//3.81204e-49	UP	69.3456	0	Inf	0.00031336	0.018669
CI01108788_00000432_00000667	inflammatory cytokines and receptors	GVIN	>ref|XP_016117125.1| interferon-induced very large GTPase 1-like [Sinocyclocheilus grahami]	sp|Q80SU7|GVIN1_MOUSE Interferon-induced very large GTPase 1 OS=Mus musculus GN=Gvin1 PE=1 SV=1//1.83993e-22	UP	111.792	0	Inf	0.000111	0.007905
CI01000287_00075255_00084717	inflammatory cytokines and receptors	GVIN	>ref|XP_016117125.1| interferon-induced very large GTPase 1-like [Sinocyclocheilus grahami]	sp|Q7Z2Y8|GVIN1_HUMAN Interferon-induced very large GTPase 1 OS=Homo sapiens GN=GVINP1 PE=2 SV=2//3.33271e-77	UP	236.989	2.28591	6.6959	4.5828e-09	1.1423e-06
CI01108789_00000054_00001049	inflammatory cytokines and receptors	GVIN	>ref|XP_016117385.1| interferon-induced very large GTPase 1-like, partial [Sinocyclocheilus grahami]	sp|Q80SU7|GVIN1_MOUSE Interferon-induced very large GTPase 1 OS=Mus musculus GN=Gvin1 PE=1 SV=1//5.51246e-105	UP	139.546	2.3859	5.8701	7.2037e-05	0.0055124
CI01000287_00035891_00041230	inflammatory cytokines and receptors	GVIN	>ref|XP_016116723.1| interferon-induced very large GTPase 1-like [Sinocyclocheilus grahami]	sp|Q7Z2Y8|GVIN1_HUMAN Interferon-induced very large GTPase 1 OS=Homo sapiens GN=GVINP1 PE=2 SV=2//2.34428e-58	UP	366.357	12.9985	4.8168	9.519e-13	4.4204e-10
CI01000428_00049592_00067270	inflammatory cytokines and receptors	GVIN	>ref|XP_016117125.1| interferon-induced very large GTPase 1-like [Sinocyclocheilus grahami]	sp|Q7Z2Y8|GVIN1_HUMAN Interferon-induced very large GTPase 1 OS=Homo sapiens GN=GVINP1 PE=2 SV=2//0	UP	279.142	14.4564	4.2712	2.6174e-05	0.0023227
CI01000059_04772561_04774001	inflammatory cytokines and receptors	IFN induced proteins and relevant	>ref|XP_016131087.1| uncharacterized protein LOC107587718 [Sinocyclocheilus grahami]	sp|Q5T764|IFT1B_HUMAN Interferon-induced protein with tetratricopeptide repeats 1B OS=Homo sapiens GN=IFIT1B PE=2 SV=1//1.86931e-72	UP	54.2787	15.859	1.7751	0.0005273	0.027886
CI01180000_01366302_01368307	inflammatory cytokines and receptors	IRF	>ref|XP_016104736.1| interferon regulatory factor 2-binding protein 2-A isoform X1 [Sinocyclocheilus grahami] ref|XP_016104737.1|	sp|Q6NZT6|I2B2A_DANRE Interferon regulatory factor 2-binding protein 2-A OS=Danio rerio GN=irf2bp2a PE=2 SV=1//9.46197e-77	UP	5243.47	1910.79	1.4564	9.712e-06	0.0010007
CI01000185_00015550_00020227	inflammatory cytokines and receptors	IRF	>gb|AMT92196.1| interferon regulatory factor 6 [Ctenopharyngodon idella]	sp|P97431|IRF6_MOUSE Interferon regulatory factor 6 OS=Mus musculus GN=Irf6 PE=1 SV=2//0	UP	1957.26	811.784	1.2697	0.00013518	0.0093327
CI01000310_04400605_04402587	inflammatory cytokines and receptors	IRF	>ref|XP_016395165.1| interferon regulatory factor 2-binding protein-like [Sinocyclocheilus rhinocerous]	sp|Q6PCG7|I2BLB_XENLA Interferon regulatory factor 2-binding protein-like B OS=Xenopus laevis GN=irf2bpl-b PE=2 SV=1//0	UP	636.618	267.198	1.2525	0.00034867	0.020239
CI01000113_02491883_02493061	inflammatory cytokines and receptors	NFIL3	>ref|XP_016304042.1| nuclear factor interleukin-3-regulated protein-like [Sinocyclocheilus anshuiensis]	sp|Q5FW38|NFIL3_XENTR Nuclear factor interleukin-3-regulated protein OS=Xenopus tropicalis GN=nfil3 PE=2 SV=1//1.08919e-19	UP	12121.6	1930.39	2.6506	1.1327e-14	6.8567e-12
CI01000158_00735610_00736996	other genes related to immune response	caspase	>gb|KTF84577.1| hypothetical protein cypCar_00049256 [Cyprinus carpio]	sp|Q60431|CASP3_MESAU Caspase-3 OS=Mesocricetus auratus GN=CASP3 PE=2 SV=1//2.68932e-32	UP	781.255	85.2678	3.1957	2.3374e-06	0.00030128
CI01000158_00743384_00745236	other genes related to immune response	caspase	>ref|XP_016302692.1| caspase-3-like [Sinocyclocheilus anshuiensis]	sp|P55210|CASP7_HUMAN Caspase-7 OS=Homo sapiens GN=CASP7 PE=1 SV=1//1.00252e-31	UP	332.561	76.8535	2.1134	1.9082e-08	4.1734e-06
CI01000347_00576004_00576843	other genes related to immune response	CEBP	>ref|XP_016094874.1| CCAAT/enhancer-binding protein beta-like [Sinocyclocheilus grahami]	sp|Q05826|CEBPB_CHICK CCAAT/enhancer-binding protein beta OS=Gallus gallus GN=CEBPB PE=1 SV=1//3.7496e-27	UP	11374.9	1450.67	2.9711	3.8506e-17	3.1837e-14
CI01000082_04619826_04620686	other genes related to immune response	CEBP	>ref|XP_016092738.1| CCAAT/enhancer-binding protein delta-like [Sinocyclocheilus grahami]	sp|P49716|CEBPD_HUMAN CCAAT/enhancer-binding protein delta OS=Homo sapiens GN=CEBPD PE=1 SV=2//1.63198e-58	UP	13917.6	2531.47	2.4589	4.2975e-13	2.2073e-10
CI01000086_00629905_00632087	other genes related to immune response	hepcidin	>gb|AEZ51835.1| hepcidin [Ctenopharyngodon idella]	sp|P61516|HEPC1_DANRE Hepcidin-1 OS=Danio rerio GN=hamp1 PE=3 SV=1//6.39002e-23	UP	27.5566	2.01047	3.7768	8.7325e-06	0.00093334
CI01012525_00000065_00000439	other genes related to immune response	HSP	>ref|XP_016344064.1| heat shock 70 kDa protein-like [Sinocyclocheilus anshuiensis]	sp|Q91233|HSP70_ONCTS Heat shock 70 kDa protein OS=Oncorhynchus tshawytscha GN=hsp70 PE=2 SV=1//1.96455e-54	UP	217.88	9.77521	4.4783	1.3437e-20	1.4694e-17
CI01000069_00000091_00001650	other genes related to immune response	HSP	>gb|ADX32514.1| heat shock 70 kDa protein [Ctenopharyngodon idella]	sp|Q9I8F9|HSP71_ORYLA Heat shock 70 kDa protein 1 OS=Oryzias latipes PE=3 SV=1//0	UP	950.221	59.3692	4.0005	9.5073e-06	0.00099472
CI01111733_00002385_00003170	other genes related to immune response	HSP	>gb|KTF85564.1| hypothetical protein cypCar_00012415 [Cyprinus carpio]	sp|Q91233|HSP70_ONCTS Heat shock 70 kDa protein OS=Oncorhynchus tshawytscha GN=hsp70 PE=2 SV=1//1.32596e-140	UP	32.2132	4.35315	2.8875	6.2259e-05	0.0048517
CI01000027_08033124_08037571	other genes related to immune response	myeloid cell related	>ref|XP_016410008.1| induced myeloid leukemia cell differentiation protein Mcl-1 homolog [Sinocyclocheilus rhinocerous]	sp|Q8HYS5|MCL1_CANFA Induced myeloid leukemia cell differentiation protein Mcl-1 homolog OS=Canis familiaris GN=MCL1 PE=2 SV=1//6.82704e-24	UP	5128.28	1813.77	1.4995	4.7544e-06	0.00055007
CI01000029_05429198_05430689	other genes related to immune response	oncogene	>gb|AAK58088.1|AF380155_1 c-Fos [Ctenopharyngodon idella] gb|ABB99429.1| c-Fos protein	sp|P79702|FOS_CYPCA Proto-oncogene c-Fos OS=Cyprinus carpio GN=fos PE=2 SV=1//3.1514e-133	UP	4045.98	237.33	4.0915	3.2146e-11	1.1593e-08
CI01000344_01634301_01634892	other genes related to immune response	ubiquitin ligase	>ref|XP_016398612.1| E3 ubiquitin-protein ligase RNF182-like [Sinocyclocheilus rhinocerous]	sp|D2H788|RN182_AILME E3 ubiquitin-protein ligase RNF182 OS=Ailuropoda melanoleuca GN=RNF182 PE=3 SV=1//6.04502e-11	UP	3664.26	308.232	3.5714	2.7078e-22	3.991e-19
CI01000319_03180932_03187841	other genes related to immune response	ubiquitin ligase	>ref|XP_016313640.1| pyrin-like isoform X2 [Sinocyclocheilus anshuiensis]	sp|P19474|RO52_HUMAN E3 ubiquitin-protein ligase TRIM21 OS=Homo sapiens GN=TRIM21 PE=1 SV=1//1.92795e-17	UP	65.1601	6.74844	3.2714	0.00041409	0.02324
CI01000029_09091229_09095666	other genes related to immune response	ubiquitin ligase	>ref|XP_002665865.5| E3 ubiquitin-protein ligase pellino homolog 2-like [Danio rerio]	sp|Q9HAT8|PELI2_HUMAN E3 ubiquitin-protein ligase pellino homolog 2 OS=Homo sapiens GN=PELI2 PE=1 SV=1//0	UP	378.796	137.434	1.4627	5.7899e-05	0.0045328
CI01000320_00264815_00284889	other genes related to immune response	ubiquitin ligase	>ref|XP_016418619.1| E3 ubiquitin-protein ligase RNF19A-like isoform X2 [Sinocyclocheilus rhinocerous]	sp|Q9NV58|RN19A_HUMAN E3 ubiquitin-protein ligase RNF19A OS=Homo sapiens GN=RNF19A PE=1 SV=3//0	UP	2747.63	1300.57	1.079	0.00095827	0.044806
CI01000129_00996334_01002659	pattern recognition	C-type lectin	>ref|XP_016322156.1| asialoglycoprotein receptor 1-like [Sinocyclocheilus anshuiensis]	sp|Q8IUN9|CLC10_HUMAN C-type lectin domain family 10 member A OS=Homo sapiens GN=CLEC10A PE=2 SV=1//9.98358e-35	UP	46.2499	0.355128	7.025	1.2419e-12	5.6891e-10
CI01000304_06489010_06490993	pattern recognition	Fish-egg lectin	>gb|KTG43673.1| hypothetical protein cypCar_00031365 [Cyprinus carpio]	sp|P68512|FEL_CYPCA Fish-egg lectin OS=Cyprinus carpio PE=1 SV=1//1.78718e-127	UP	547.378	195.167	1.4878	1.2737e-05	0.0012443
CI01000358_00458949_00461373	pattern recognition	galectin	>ref|XP_016116349.1| galectin-9-like isoform X2 [Sinocyclocheilus grahami]	sp|Q29058|LEG4_PIG Galectin-4 OS=Sus scrofa GN=LGALS4 PE=2 SV=1//9.26894e-13	UP	62.4749	3.89964	4.0019	1.5657e-10	4.9605e-08
CI01000116_00302998_00308114	pattern recognition	intelectin	>gb|AAY43356.2| intelectin [Ctenopharyngodon idella]	sp|P0DMV4|ITLN_ONCMY Intelectin OS=Oncorhynchus mykiss GN=itln PE=1 SV=1//1.72886e-116	UP	110.569	19.0696	2.5356	4.544e-08	9.1146e-06
CI01000012_11799629_11846842	T/B cell antigen activation	BCL	>ref|XP_016313257.1| B-cell lymphoma/leukemia 11A-like [Sinocyclocheilus anshuiensis]	sp|Q9H165|BC11A_HUMAN B-cell lymphoma/leukemia 11A OS=Homo sapiens GN=BCL11A PE=1 SV=2//0	UP	88.3352	20.0063	2.1425	0.00048362	0.02607
CI01000039_04384983_04394003	T/B cell antigen activation	FCGBP	>ref|XP_016089982.1| IgGFc-binding protein-like [Sinocyclocheilus grahami]	sp|Q9Y6R7|FCGBP_HUMAN IgGFc-binding protein OS=Homo sapiens GN=FCGBP PE=1 SV=3//8.60662e-26	UP	12.1907	0.305131	5.3202	0.00053024	0.027954
CI01000059_09990989_09995182	T/B cell antigen activation	RGS	>ref|XP_005168466.1| regulator of G-protein signaling 3 isoform X5 [Danio rerio]	sp|P49796|RGS3_HUMAN Regulator of G-protein signaling 3 OS=Homo sapiens GN=RGS3 PE=1 SV=2//9.04053e-69	UP	4367.64	387.718	3.4938	1.1072e-07	1.9755e-05

## Sheet: gut 5w vs 3w down
Gene ID	immune Process	Immune gene categery	Blasted with NR	Blasted with SWISS PROT	State	readcount_gut_2	readcount_gut_1	log2FoldChange	pval	padj
CI01000300_01006794_01019023	adapters effectors and signal transducers	Lysosomal protein	>ref|XP_016390119.1| lysosomal alpha-glucosidase-like [Sinocyclocheilus rhinocerous]	sp|P70699|LYAG_MOUSE Lysosomal alpha-glucosidase OS=Mus musculus GN=Gaa PE=1 SV=2//0	DOWN	777.675	2020.01	-1.3771	0.00052209	0.027653
CI01015435_00001076_00002375	adapters effectors and signal transducers	NLRC3	>ref|XP_016317812.1| protein NLRC3-like [Sinocyclocheilus anshuiensis]	sp|Q7RTR2|NLRC3_HUMAN Protein NLRC3 OS=Homo sapiens GN=NLRC3 PE=2 SV=2//3.99031e-41	DOWN	40.4698	147.024	-1.8611	7.8935e-06	0.00086316
CI01000306_05805669_05822854	antigen processing and regulators	CDK and related	>ref|XP_016350359.1| cyclin-dependent kinase-like 5 isoform X2 [Sinocyclocheilus anshuiensis]	sp|Q3UTQ8|CDKL5_MOUSE Cyclin-dependent kinase-like 5 OS=Mus musculus GN=Cdkl5 PE=2 SV=1//0	DOWN	180.49	707.358	-1.9705	8.3244e-06	0.00090736
CI01000026_11698637_11702653	antigen processing and regulators	MAF	>ref|XP_016299452.1| repressor of RNA polymerase III transcription MAF1 homolog [Sinocyclocheilus anshuiensis] ref|XP_016299453.1|	sp|Q7ZWL6|MAF1_XENLA Repressor of RNA polymerase III transcription MAF1 homolog OS=Xenopus laevis GN=maf1 PE=2 SV=1//9.57064e-110	DOWN	1034.66	2341.47	-1.1783	0.00041491	0.023248
CI01046163_00002590_00013429	antigen processing and regulators	MHC I related	>gb|KTG06249.1| hypothetical protein cypCar_00030460, partial [Cyprinus carpio]	sp|O19477|HMR1_RAT Major histocompatibility complex class I-related gene protein OS=Rattus norvegicus GN=Mr1 PE=2 SV=2//3.55389e-22	DOWN	0	269.213	#NAME?	2.1979e-05	0.0019816
CI01000161_00326033_00349039	antigen processing and regulators	TNF,TNR and related	>ref|XP_016346313.1| tumor necrosis factor ligand superfamily member 10-like [Sinocyclocheilus anshuiensis]	sp|P50591|TNF10_HUMAN Tumor necrosis factor ligand superfamily member 10 OS=Homo sapiens GN=TNFSF10 PE=1 SV=1//1.48326e-30	DOWN	717.329	1557.57	-1.1186	0.00084962	0.040508
CI01000080_03858298_03868014	antigen processing and regulators	TNF,TNR and related	>ref|XP_016341882.1| tumor necrosis factor ligand superfamily member 11-like isoform X1 [Sinocyclocheilus anshuiensis] ref|XP_016341883.1|	sp|P50592|TNF10_MOUSE Tumor necrosis factor ligand superfamily member 10 OS=Mus musculus GN=Tnfsf10 PE=2 SV=1//3.17315e-16	DOWN	79.3595	198.023	-1.3192	0.00069001	0.034653
CI01000030_10958494_10960930	antigen processing and regulators	TNF,TNR and related	>ref|XP_016400388.1| tumor necrosis factor alpha-induced protein 8-like protein 1 isoform X1 [Sinocyclocheilus rhinocerous]	sp|Q7SZE8|TP8L1_DANRE Tumor necrosis factor alpha-induced protein 8-like protein 1 OS=Danio rerio GN=tnfaip8l1 PE=2 SV=1//2.7182e-122	DOWN	270.801	766.474	-1.501	1.311e-05	0.0012734
CI01000352_00233543_00234955	complement system	C3aR	>ref|XP_016325843.1| C3a anaphylatoxin chemotactic receptor-like [Sinocyclocheilus anshuiensis]	sp|P0C7U4|C3AR_DANRE C3a anaphylatoxin chemotactic receptor OS=Danio rerio GN=c3ar1 PE=3 SV=1//7.72481e-50	DOWN	45.8657	195.28	-2.0901	0.00017971	0.011969
CI01000095_03409665_03426093	complement system	MASP	>ref|XP_016363213.1| mannan-binding lectin serine protease 1-like [Sinocyclocheilus anshuiensis]	sp|P48740|MASP1_HUMAN Mannan-binding lectin serine protease 1 OS=Homo sapiens GN=MASP1 PE=1 SV=3//0	DOWN	210.289	530.768	-1.3357	0.00011493	0.0081507
CI01000021_02495559_02501217	inflammatory cytokines and receptors	FAM	>ref|XP_016364556.1| uncharacterized protein LOC107705678 [Sinocyclocheilus rhinocerous] ref|XP_016364557.1|	sp|Q9NTX9|F217B_HUMAN Protein FAM217B OS=Homo sapiens GN=FAM217B PE=2 SV=1//1.21252e-17	DOWN	43.591	146.067	-1.7445	3.1319e-05	0.0027015
CI01000072_02348164_02349155	inflammatory cytokines and receptors	FAM	>ref|XP_016311118.1| filamin-interacting protein FAM101B-like [Sinocyclocheilus anshuiensis]	sp|Q6AXS9|F101B_RAT Filamin-interacting protein FAM101B OS=Rattus norvegicus GN=Fam101b PE=2 SV=1//3.34203e-42	DOWN	74.1986	265.735	-1.8405	1.9258e-06	0.00025804
CI01000027_10609852_10616902	inflammatory cytokines and receptors	FAM	>ref|NP_001071274.1| uncharacterized protein LOC777768 [Danio rerio] gb|AAI27403.1|	sp|Q96IP4|FA46A_HUMAN Protein FAM46A OS=Homo sapiens GN=FAM46A PE=1 SV=2//0	DOWN	234.511	861.814	-1.8777	6.0612e-08	1.1479e-05
CI01000010_04433165_04436747	inflammatory cytokines and receptors	FAM	>ref|XP_016371264.1| protein FAM173B-like isoform X1 [Sinocyclocheilus rhinocerous]	sp|Q5I047|F173B_XENLA Protein FAM173B OS=Xenopus laevis GN=fam173b PE=2 SV=1//5.79767e-44	DOWN	80.3527	392.994	-2.2901	0.0003899	0.022214
CI01000447_00033061_00051445	inflammatory cytokines and receptors	GVIN	>gb|KTF77634.1| hypothetical protein cypCar_00036863 [Cyprinus carpio]	sp|Q80SU7|GVIN1_MOUSE Interferon-induced very large GTPase 1 OS=Mus musculus GN=Gvin1 PE=1 SV=1//3.82969e-17	DOWN	22.1173	504.744	-4.5123	0.00018714	0.01239
CI01000261_00000113_00007868	inflammatory cytokines and receptors	GVIN	>gb|KTF85296.1| hypothetical protein cypCar_00040372 [Cyprinus carpio]	sp|Q7Z2Y8|GVIN1_HUMAN Interferon-induced very large GTPase 1 OS=Homo sapiens GN=GVINP1 PE=2 SV=2//2.11626e-100	DOWN	1.3248	1740.88	-10.36	0.00097099	0.045338
CI01000013_04943413_04948991	inflammatory cytokines and receptors	IL34	>ref|XP_016338803.1| interleukin-34-like isoform X2 [Sinocyclocheilus anshuiensis]	sp|Q6ZMJ4|IL34_HUMAN Interleukin-34 OS=Homo sapiens GN=IL34 PE=1 SV=1//2.85584e-20	DOWN	317.18	825.479	-1.3799	5.5382e-05	0.0043559
CI01000040_03226639_03227469	inflammatory cytokines and receptors	IL4	>dbj|BAM09149.1| interleukin 4/13A [Cyprinus carpio]	-//-	DOWN	16.4142	63.954	-1.9621	0.00016051	0.010796
CI01000006_06267132_06269409	inflammatory cytokines and receptors	IL7R	>gb|KTG06967.1| hypothetical protein cypCar_00004380 [Cyprinus carpio]	sp|P16872|IL7RA_MOUSE Interleukin-7 receptor subunit alpha OS=Mus musculus GN=Il7r PE=1 SV=2//1.0004e-09	DOWN	384.895	871.858	-1.1796	0.00051635	0.027435
CI01000321_01773447_01776531	other genes related to immune response	ADNP	>ref|XP_016419102.1| ADNP homeobox protein 2-like [Sinocyclocheilus rhinocerous]	sp|Q6IQ32|ADNP2_HUMAN ADNP homeobox protein 2 OS=Homo sapiens GN=ADNP2 PE=1 SV=1//3.0591e-11	DOWN	130.632	307.356	-1.2344	0.00069969	0.035035
CI01000255_00197338_00204060	other genes related to immune response	GIAMP	>ref|XP_016392286.1| GTPase IMAP family member 7-like [Sinocyclocheilus rhinocerous]	sp|Q8NHV1|GIMA7_HUMAN GTPase IMAP family member 7 OS=Homo sapiens GN=GIMAP7 PE=1 SV=1//4.8467e-44	DOWN	0	166.208	#NAME?	2.8682e-32	7.4792e-29
CI01000255_00220656_00222501	other genes related to immune response	GIAMP	>gb|KTG04671.1| hypothetical protein cypCar_00015478 [Cyprinus carpio]	sp|Q8K3K9|GIMA4_RAT GTPase IMAP family member 4 OS=Rattus norvegicus GN=Gimap4 PE=2 SV=1//3.73364e-20	DOWN	0	24.4221	#NAME?	0.00030242	0.018215
CI01000255_00229271_00231740	other genes related to immune response	GIAMP	>ref|XP_005158038.1| uncharacterized protein LOC436616 [Danio rerio]	sp|Q9NUV9|GIMA4_HUMAN GTPase IMAP family member 4 OS=Homo sapiens GN=GIMAP4 PE=1 SV=1//3.65247e-48	DOWN	0	163.293	#NAME?	6.6427e-32	1.5012e-28
CI01000291_00020500_00030047	other genes related to immune response	GIAMP	>ref|XP_016334868.1| GTPase IMAP family member 7-like, partial [Sinocyclocheilus anshuiensis]	sp|Q8NHV1|GIMA7_HUMAN GTPase IMAP family member 7 OS=Homo sapiens GN=GIMAP7 PE=1 SV=1//1.39371e-28	DOWN	64.0394	170.388	-1.4118	0.00038503	0.022048
CI01000357_00636924_00637862	other genes related to immune response	GIAMP	>ref|XP_016105359.1| GTPase IMAP family member 7-like [Sinocyclocheilus grahami]	sp|Q9UG22|GIMA2_HUMAN GTPase IMAP family member 2 OS=Homo sapiens GN=GIMAP2 PE=1 SV=2//3.19546e-37	DOWN	16.8517	79.5675	-2.2393	0.00040803	0.022976
CI01000255_00211714_00212715	other genes related to immune response	GIAMP	>ref|XP_016398206.1| GTPase IMAP family member 7-like, partial [Sinocyclocheilus rhinocerous]	sp|Q96F15|GIMA5_HUMAN GTPase IMAP family member 5 OS=Homo sapiens GN=GIMAP5 PE=1 SV=1//1.241e-33	DOWN	7.71837	198.493	-4.6847	1.9128e-21	2.494e-18
CI01000255_00250820_00261139	other genes related to immune response	GIAMP	>ref|XP_016400014.1| GTPase IMAP family member 7-like [Sinocyclocheilus rhinocerous]	sp|Q8NHV1|GIMA7_HUMAN GTPase IMAP family member 7 OS=Homo sapiens GN=GIMAP7 PE=1 SV=1//6.75829e-45	DOWN	2.97538	507.812	-7.4151	8.1485e-45	6.9057e-41
CI01000255_00236688_00243170	other genes related to immune response	GIAMP	>ref|XP_016400013.1| GTPase IMAP family member 4-like isoform X2 [Sinocyclocheilus rhinocerous]	sp|Q75N62|GIMA8_MOUSE GTPase IMAP family member 8 OS=Mus musculus GN=Gimap8 PE=2 SV=1//4.31979e-15	DOWN	0.331974	264.791	-9.6396	2.7173e-35	7.6761e-32
CI01000255_00208007_00210331	other genes related to immune response	GIAMP	>ref|XP_009297299.1| GTPase IMAP family member 8-like [Danio rerio]	sp|Q75N62|GIMA8_MOUSE GTPase IMAP family member 8 OS=Mus musculus GN=Gimap8 PE=2 SV=1//1.86397e-37	DOWN	0.321215	341.53	-10.054	3.424e-44	2.3214e-40
CI01000029_02593889_02603627	other genes related to immune response	HSP	>ref|XP_016378948.1| heat shock factor protein 2-like [Sinocyclocheilus rhinocerous]	sp|P38530|HSF2_CHICK Heat shock factor protein 2 OS=Gallus gallus GN=HSF2 PE=2 SV=1//5.12557e-80	DOWN	562.234	1389.79	-1.3056	9.6488e-05	0.0070475
CI01000319_03402932_03447997	other genes related to immune response	ubiquitin ligase	>ref|XP_010748987.1| pyrin-like [Larimichthys crocea]	sp|P19474|RO52_HUMAN E3 ubiquitin-protein ligase TRIM21 OS=Homo sapiens GN=TRIM21 PE=1 SV=1//3.87618e-12	DOWN	150.46	354.576	-1.2367	0.00066301	0.033696
CI01000004_09627968_09635256	other genes related to immune response	ubiquitin ligase	>ref|XP_016108575.1| E3 ubiquitin-protein ligase rnf152-like [Sinocyclocheilus grahami]	sp|Q58EC8|RN152_DANRE E3 ubiquitin-protein ligase rnf152 OS=Danio rerio GN=rnf152 PE=2 SV=1//9.9539e-81	DOWN	157.809	465.116	-1.5594	1.0989e-05	0.0010928
CI01000303_00126231_00139526	pattern recognition	LPS-anchor protein	>ref|XP_016361925.1| lipopolysaccharide-induced tumor necrosis factor-alpha factor homolog isoform X4 [Sinocyclocheilus anshuiensis]	sp|Q9JLJ0|LITAF_MOUSE Lipopolysaccharide-induced tumor necrosis factor-alpha factor homolog OS=Mus musculus GN=Litaf PE=1 SV=1//5.36556e-13	DOWN	211.385	784.454	-1.8918	3.7466e-07	5.9073e-05
CI01000012_06993214_06995298	pattern recognition	LRR-containing proteins	>gb|KTF77272.1| hypothetical protein cypCar_00042077 [Cyprinus carpio]	sp|Q9NZU0|FLRT3_HUMAN Leucine-rich repeat transmembrane protein FLRT3 OS=Homo sapiens GN=FLRT3 PE=1 SV=1//0	DOWN	124.409	291.802	-1.2299	0.00067946	0.034225
CI01000026_04396015_04397830	pattern recognition	LRR-containing proteins	>ref|XP_016409642.1| F-box/LRR-repeat protein 8-like [Sinocyclocheilus rhinocerous]	sp|Q8CIG9|FBXL8_MOUSE F-box/LRR-repeat protein 8 OS=Mus musculus GN=Fbxl8 PE=1 SV=1//2.59014e-69	DOWN	238.286	664.743	-1.4801	0.00062734	0.032173
CI01000299_00082987_00089134	T/B cell antigen activation	CD2	>ref|XP_016396732.1| T-cell surface antigen CD2-like isoform X2 [Sinocyclocheilus rhinocerous]	-//-	DOWN	288.694	695.023	-1.2675	0.00038944	0.022214
CI01000219_00709988_00712481	T/B cell antigen activation	PIGR	>ref|XP_016398979.1| polymeric immunoglobulin receptor-like [Sinocyclocheilus rhinocerous]	-//-	DOWN	0.64243	14.3674	-4.4831	0.00038688	0.022116

## Sheet: gut 7w vs 5w up
Gene ID	immune Process	Immune gene categery	Blasted with NR	Blasted with SWISS PROT	State	readcount_gut_2	readcount_gut_1	log2FoldChange	pval	padj
CI01000133_01271640_01272900	antigen processing and regulators	CDK and related	>ref|XP_016355887.1| cyclin-dependent kinase inhibitor 1B-like isoform X2 [Sinocyclocheilus anshuiensis] ref|XP_016355888.1|	sp|P38936|CDN1A_HUMAN Cyclin-dependent kinase inhibitor 1 OS=Homo sapiens GN=CDKN1A PE=1 SV=3//2.61074e-14	UP	164.048	35.4474	2.2104	1.3584e-06	0.0005849
CI01000053_03484197_03496907	antigen processing and regulators	MHC I related	>ref|XP_016087355.1| major histocompatibility complex class I-related gene protein-like [Sinocyclocheilus grahami]	sp|P15979|HA1F_CHICK Class I histocompatibility antigen, F10 alpha chain OS=Gallus gallus PE=2 SV=1//1.81076e-18	UP	37.4904	7.10249	2.4001	0.00026885	0.026437
CI01000006_07214841_07222648	complement system	C6	>gb|ADV18976.1| complement component C6 [Ctenopharyngodon idella] gb|AFN26001.1|	sp|P61135|CO6_PONPY Complement component C6 OS=Pongo pygmaeus GN=C6 PE=2 SV=1//0	UP	1285.98	484.735	1.4076	0.00013424	0.016099
CI01000016_11330944_11334103	inflammatory cytokines and receptors	CCR	>ref|XP_016149407.1| C-C chemokine receptor type 5-like [Sinocyclocheilus grahami]	sp|Q8MJW8|CCR4_CANFA C-C chemokine receptor type 4 OS=Canis familiaris GN=CCR4 PE=2 SV=1//2.13604e-73	UP	158.026	52.3852	1.5929	0.00015615	0.018253
CI01000044_00113112_00118687	other genes related to immune response	caspase	>ref|XP_016329474.1| caspase-3-like isoform X2 [Sinocyclocheilus anshuiensis]	sp|Q08DY9|CASP3_BOVIN Caspase-3 OS=Bos taurus GN=CASP3 PE=2 SV=1//5.0222e-102	UP	957.927	253.009	1.9207	1.2759e-07	9.2339e-05
CI01000026_02722558_02725907	other genes related to immune response	CD82	>ref|XP_016421593.1| CD82 antigen-like [Sinocyclocheilus rhinocerous]	sp|O70352|CD82_RAT CD82 antigen OS=Rattus norvegicus GN=Cd82 PE=1 SV=1//6.71733e-53	UP	812.685	343.933	1.2406	0.00041451	0.034814
CI01000255_00197338_00204060	other genes related to immune response	GIAMP	>ref|XP_016392286.1| GTPase IMAP family member 7-like [Sinocyclocheilus rhinocerous]	sp|Q8NHV1|GIMA7_HUMAN GTPase IMAP family member 7 OS=Homo sapiens GN=GIMAP7 PE=1 SV=1//4.8467e-44	UP	73.7652	0	Inf	0.00066166	0.045744
CI01000255_00208007_00210331	other genes related to immune response	GIAMP	>ref|XP_009297299.1| GTPase IMAP family member 8-like [Danio rerio]	sp|Q75N62|GIMA8_MOUSE GTPase IMAP family member 8 OS=Mus musculus GN=Gimap8 PE=2 SV=1//1.86397e-37	UP	135.339	0.31546	8.7449	0.00013564	0.016132
CI01000095_03508757_03510876	other genes related to immune response	GIAMP	>ref|XP_016335002.1| GTPase IMAP family member 8-like [Sinocyclocheilus anshuiensis]	sp|Q8ND71|GIMA8_HUMAN GTPase IMAP family member 8 OS=Homo sapiens GN=GIMAP8 PE=2 SV=2//1.38895e-12	UP	57.3379	11.5482	2.3118	4.7959e-05	0.0078452
CI01000004_09627968_09635256	other genes related to immune response	ubiquitin ligase	>ref|XP_016108575.1| E3 ubiquitin-protein ligase rnf152-like [Sinocyclocheilus grahami]	sp|Q58EC8|RN152_DANRE E3 ubiquitin-protein ligase rnf152 OS=Danio rerio GN=rnf152 PE=2 SV=1//9.9539e-81	UP	387.816	154.389	1.3288	0.00049184	0.038302
CI01000127_01764767_01770711	pattern recognition	HMG	>gb|KTG33108.1| hypothetical protein cypCar_00017874, partial [Cyprinus carpio]	sp|O60381|HBP1_HUMAN HMG box-containing protein 1 OS=Homo sapiens GN=HBP1 PE=1 SV=2//4.78071e-172	UP	1905.73	677.538	1.492	0.00010846	0.013904
CI01000299_04496757_04504238	T/B cell antigen activation	CD48	>gb|KTF81145.1| hypothetical protein cypCar_00007674, partial [Cyprinus carpio]	sp|P18181|CD48_MOUSE CD48 antigen OS=Mus musculus GN=Cd48 PE=1 SV=1//4.75073e-07	UP	133.745	38.573	1.7938	4.19e-05	0.0071873

## Sheet: gut 7w vs 5w down
Gene ID	immune Process	Immune gene categery	Blasted with NR	Blasted with SWISS PROT	State	readcount_gut_2	readcount_gut_1	log2FoldChange	pval	padj
CI01000015_07123336_07130178	adapters effectors and signal transducers	CD276	>ref|XP_016370949.1| CD276 antigen homolog [Sinocyclocheilus rhinocerous]	sp|P04323|POL3_DROME Retrovirus-related Pol polyprotein from transposon 17.6 OS=Drosophila melanogaster GN=pol PE=3 SV=1//4.21698e-09	DOWN	35.2799	105.681	-1.5828	0.00066524	0.045899
CI01000012_05565127_05567009	adapters effectors and signal transducers	CD276	>ref|XP_016407631.1| programmed cell death 1 ligand 1-like [Sinocyclocheilus rhinocerous]	sp|Q5ZPR3|CD276_HUMAN CD276 antigen OS=Homo sapiens GN=CD276 PE=1 SV=1//2.262e-17	DOWN	421.132	1454.35	-1.788	0.00038114	0.033327
CI01000340_10252718_10253859	adapters effectors and signal transducers	CIS	>gb|ADC54227.1| cytokine-inducible Src homology 2 [Ctenopharyngodon idella]	sp|Q9PW70|CISH_CHICK Cytokine-inducible SH2-containing protein OS=Gallus gallus GN=CISH PE=2 SV=1//2.27282e-47	DOWN	428.175	2431.6	-2.5056	1.7428e-08	2.1172e-05
CI01180000_01630692_01655733	adapters effectors and signal transducers	Lysosomal protein	>ref|XP_016343394.1| lysosomal-trafficking regulator-like [Sinocyclocheilus anshuiensis]	sp|Q99698|LYST_HUMAN Lysosomal-trafficking regulator OS=Homo sapiens GN=LYST PE=1 SV=3//0	DOWN	71.1297	260.264	-1.8714	2.1e-05	0.0043536
CI01000024_03734605_03757457	adapters effectors and signal transducers	MAPK	>gb|KTG44667.1| hypothetical protein cypCar_00031991 [Cyprinus carpio]	sp|Q9Y2U5|M3K2_HUMAN Mitogen-activated protein kinase kinase kinase 2 OS=Homo sapiens GN=MAP3K2 PE=1 SV=2//0	DOWN	204.067	696.476	-1.771	9.6317e-07	0.0004488
CI01000200_00490226_00514771	adapters effectors and signal transducers	MAPK related	>ref|XP_016318496.1| mitogen-activated protein kinase kinase kinase 11-like [Sinocyclocheilus anshuiensis]	sp|Q16584|M3K11_HUMAN Mitogen-activated protein kinase kinase kinase 11 OS=Homo sapiens GN=MAP3K11 PE=1 SV=1//5.41916e-100	DOWN	90.389	230.011	-1.3475	0.00055352	0.04129
CI01000198_00095177_00107326	adapters effectors and signal transducers	MAPK related	>ref|XP_016097540.1| mitogen-activated protein kinase kinase kinase 13-like isoform X1 [Sinocyclocheilus grahami] ref|XP_016097541.1|	sp|Q1HKZ5|M3K13_MOUSE Mitogen-activated protein kinase kinase kinase 13 OS=Mus musculus GN=Map3k13 PE=2 SV=1//0	DOWN	116.662	423.322	-1.8594	0.00056877	0.041966
CI01000092_03702024_03712418	adapters effectors and signal transducers	NLRC3	>ref|XP_016115374.1| NACHT, LRR and PYD domains-containing protein 12-like [Sinocyclocheilus grahami]	sp|Q7RTR2|NLRC3_HUMAN Protein NLRC3 OS=Homo sapiens GN=NLRC3 PE=2 SV=2//3.28586e-57	DOWN	47.966	218.788	-2.1894	4.9687e-08	4.8289e-05
CI01000092_04822399_04827194	adapters effectors and signal transducers	NLRC3	>ref|XP_016108896.1| NACHT, LRR and PYD domains-containing protein 3-like [Sinocyclocheilus grahami]	sp|Q7RTR2|NLRC3_HUMAN Protein NLRC3 OS=Homo sapiens GN=NLRC3 PE=2 SV=2//7.72908e-65	DOWN	48.5051	307.918	-2.6663	1.701e-11	5.2601e-08
CI01027133_00001270_00003645	adapters effectors and signal transducers	NLRC3	>ref|XP_016308250.1| protein NLRC3-like [Sinocyclocheilus anshuiensis]	sp|Q7RTR2|NLRC3_HUMAN Protein NLRC3 OS=Homo sapiens GN=NLRC3 PE=2 SV=2//5.20426e-25	DOWN	38.7855	255.897	-2.722	4.9818e-05	0.0080316
CI01000043_01383746_01406582	adapters effectors and signal transducers	PPARA	>ref|XP_016391036.1| peroxisome proliferator-activated receptor gamma coactivator 1-alpha isoform X3 [Sinocyclocheilus rhinocerous]	sp|Q865B7|PRGC1_BOVIN Peroxisome proliferator-activated receptor gamma coactivator 1-alpha OS=Bos taurus GN=PPARGC1A PE=2 SV=1//3.507e-38	DOWN	899.448	2307.42	-1.3592	9.8722e-05	0.012965
CI01000043_01366462_01369312	adapters effectors and signal transducers	PPARA	>ref|XP_016391035.1| peroxisome proliferator-activated receptor gamma coactivator 1-alpha isoform X2 [Sinocyclocheilus rhinocerous]	sp|Q865B7|PRGC1_BOVIN Peroxisome proliferator-activated receptor gamma coactivator 1-alpha OS=Bos taurus GN=PPARGC1A PE=2 SV=1//1.04575e-07	DOWN	90.2846	294.611	-1.7063	1.2792e-05	0.0030859
CI01000000_16946558_16965306	adapters effectors and signal transducers	PPARA	>ref|XP_016307361.1| peroxisome proliferator-activated receptor gamma coactivator 1-beta isoform X1 [Sinocyclocheilus anshuiensis]	sp|Q811R2|PRGC2_RAT Peroxisome proliferator-activated receptor gamma coactivator 1-beta OS=Rattus norvegicus GN=Ppargc1b PE=2 SV=2//3.48361e-13	DOWN	860.796	2833.1	-1.7186	1.1358e-05	0.0029048
CI01000112_02774549_02777028	adapters effectors and signal transducers	SOCS (1-7)	>gb|ACC85669.1| suppressor of cytokine signalling 3 [Ctenopharyngodon idella] gb|ACD82060.1|	sp|O88583|SOCS3_RAT Suppressor of cytokine signaling 3 OS=Rattus norvegicus GN=Socs3 PE=1 SV=1//5.79145e-80	DOWN	1752.81	6781.34	-1.9519	2.2442e-08	2.4625e-05
CI01000319_06316911_06319511	antigen processing and regulators	CDK and related	>ref|XP_016425151.1| cyclin-dependent kinases regulatory subunit 1 [Sinocyclocheilus rhinocerous] ref|XP_016396112.1|	sp|P61025|CKS1_MOUSE Cyclin-dependent kinases regulatory subunit 1 OS=Mus musculus GN=Cks1b PE=3 SV=1//5.60246e-36	DOWN	10.683	65.2858	-2.6115	0.00016556	0.018898
CI01000020_07160189_07169882	antigen processing and regulators	VEGF	>ref|XP_016370350.1| vascular endothelial growth factor A-A-like isoform X5 [Sinocyclocheilus rhinocerous]	sp|O73682|VGFAA_DANRE Vascular endothelial growth factor A-A OS=Danio rerio GN=vegfaa PE=1 SV=1//1.92082e-08	DOWN	366.449	1226.11	-1.7424	6.1095e-07	0.00033376
CI01000342_00122943_00124004	complement system	C1q	>gb|KTF77486.1| hypothetical protein cypCar_00035389 [Cyprinus carpio]	sp|Q4ZJM9|C1QL4_MOUSE Complement C1q-like protein 4 OS=Mus musculus GN=C1ql4 PE=1 SV=1//3.29813e-12	DOWN	51.5993	138.394	-1.4234	0.00055326	0.04129
CI01000504_00025193_00026393	inflammatory cytokines and receptors	CXCL	>ref|XP_016416690.1| C-X-C motif chemokine 10-like [Sinocyclocheilus rhinocerous]	sp|Q5KSV9|CXL10_CANFA C-X-C motif chemokine 10 OS=Canis familiaris GN=CXCL10 PE=3 SV=1//2.16532e-08	DOWN	58.7307	181.563	-1.6283	0.00015061	0.017666
CI01000030_03018776_03042194	inflammatory cytokines and receptors	FGF and related	>ref|XP_016111587.1| fibroblast growth factor 22-like [Sinocyclocheilus grahami]	sp|O35565|FGF10_MOUSE Fibroblast growth factor 10 OS=Mus musculus GN=Fgf10 PE=2 SV=1//6.32568e-61	DOWN	0.986311	21.5469	-4.4493	2.0004e-05	0.0043065
CI01108788_00000432_00000667	inflammatory cytokines and receptors	GVIN	>ref|XP_016117125.1| interferon-induced very large GTPase 1-like [Sinocyclocheilus grahami]	sp|Q80SU7|GVIN1_MOUSE Interferon-induced very large GTPase 1 OS=Mus musculus GN=Gvin1 PE=1 SV=1//1.83993e-22	DOWN	0	109.279	#NAME?	0.00012285	0.015195
CI01000428_00049592_00067270	inflammatory cytokines and receptors	GVIN	>ref|XP_016117125.1| interferon-induced very large GTPase 1-like [Sinocyclocheilus grahami]	sp|Q7Z2Y8|GVIN1_HUMAN Interferon-induced very large GTPase 1 OS=Homo sapiens GN=GVINP1 PE=2 SV=2//0	DOWN	12.7291	273.579	-4.4257	1.8467e-05	0.0040524
CI01000135_00707778_00716012	inflammatory cytokines and receptors	IL20R	>ref|XP_016324720.1| interleukin-20 receptor subunit alpha-like [Sinocyclocheilus anshuiensis]	sp|Q9UHF4|I20RA_HUMAN Interleukin-20 receptor subunit alpha OS=Homo sapiens GN=IL20RA PE=1 SV=2//4.09614e-32	DOWN	1253.88	3118.93	-1.3147	9.1382e-05	0.012408
CI01000158_00743384_00745236	other genes related to immune response	caspase	>ref|XP_016302692.1| caspase-3-like [Sinocyclocheilus anshuiensis]	sp|P55210|CASP7_HUMAN Caspase-7 OS=Homo sapiens GN=CASP7 PE=1 SV=1//1.00252e-31	DOWN	115.226	326.24	-1.5015	5.492e-05	0.0086089
CI01000257_00019272_00021312	other genes related to immune response	GIAMP	>ref|XP_016115257.1| GTPase IMAP family member 4-like [Sinocyclocheilus grahami]	sp|Q8WWP7|GIMA1_HUMAN GTPase IMAP family member 1 OS=Homo sapiens GN=GIMAP1 PE=1 SV=1//6.19219e-35	DOWN	23.4083	127.266	-2.4428	3.8991e-07	0.00023731
CI01000009_01981245_01988092	other genes related to immune response	HSP	>gb|ADU34083.1| 60 kDa heat shock protein [Ctenopharyngodon idella]	sp|Q5ZL72|CH60_CHICK 60 kDa heat shock protein, mitochondrial OS=Gallus gallus GN=HSPD1 PE=1 SV=1//0	DOWN	1205.79	3042.41	-1.3352	0.00010873	0.013904
CI01000029_05429198_05430689	other genes related to immune response	oncogene	>gb|AAK58088.1|AF380155_1 c-Fos [Ctenopharyngodon idella] gb|ABB99429.1| c-Fos protein	sp|P79702|FOS_CYPCA Proto-oncogene c-Fos OS=Cyprinus carpio GN=fos PE=2 SV=1//3.1514e-133	DOWN	489.964	3967.28	-3.0174	5.8972e-08	5.4214e-05
CI01000055_00467053_00470243	other genes related to immune response	ubiquitin ligase	>ref|XP_016149051.1| E3 ubiquitin-protein ligase rnf213-beta-like [Sinocyclocheilus grahami]	sp|E9Q555|RN213_MOUSE E3 ubiquitin-protein ligase RNF213 OS=Mus musculus GN=Rnf213 PE=2 SV=1//3.96916e-11	DOWN	57.5945	173.277	-1.5891	0.00050916	0.038999
CI01000344_01634301_01634892	other genes related to immune response	ubiquitin ligase	>ref|XP_016398612.1| E3 ubiquitin-protein ligase RNF182-like [Sinocyclocheilus rhinocerous]	sp|D2H788|RN182_AILME E3 ubiquitin-protein ligase RNF182 OS=Ailuropoda melanoleuca GN=RNF182 PE=3 SV=1//6.04502e-11	DOWN	1142.28	3595.75	-1.6544	1.0618e-06	0.00047522
CI01000112_04050993_04055507	other genes related to immune response	ubiquitin ligase	>ref|XP_016359554.1| LOW QUALITY PROTEIN: E3 ubiquitin-protein ligase rnf213-alpha-like [Sinocyclocheilus anshuiensis]	sp|E9Q555|RN213_MOUSE E3 ubiquitin-protein ligase RNF213 OS=Mus musculus GN=Rnf213 PE=2 SV=1//0	DOWN	153.166	527.128	-1.7831	4.271e-07	0.00025048
CI01000055_00470618_00474246	other genes related to immune response	ubiquitin ligase	>ref|XP_016424882.1| E3 ubiquitin-protein ligase rnf213-beta-like [Sinocyclocheilus rhinocerous]	sp|E9Q555|RN213_MOUSE E3 ubiquitin-protein ligase RNF213 OS=Mus musculus GN=Rnf213 PE=2 SV=1//6.98898e-64	DOWN	44.2089	166.872	-1.9163	1.8522e-06	0.00075575
CI01000029_09091229_09095666	other genes related to immune response	ubiquitin ligase	>ref|XP_002665865.5| E3 ubiquitin-protein ligase pellino homolog 2-like [Danio rerio]	sp|Q9HAT8|PELI2_HUMAN E3 ubiquitin-protein ligase pellino homolog 2 OS=Homo sapiens GN=PELI2 PE=1 SV=1//0	DOWN	85.0695	371.785	-2.1278	2.9183e-08	3.0081e-05
CI01000352_01995444_02018061	other genes related to immune response	ubiquitin ligase	>ref|XP_009301944.1| probable E3 ubiquitin-protein ligase HECTD4 isoform X2 [Danio rerio]	sp|Q9Y4D8|HECD4_HUMAN Probable E3 ubiquitin-protein ligase HECTD4 OS=Homo sapiens GN=HECTD4 PE=1 SV=5//2.20926e-29	DOWN	31.6304	151.232	-2.2574	0.00010107	0.013223
CI01000340_00197972_00296049	other genes related to immune response	ubiquitin related	>ref|XP_016401243.1| ubiquitin carboxyl-terminal hydrolase 43-like [Sinocyclocheilus rhinocerous]	sp|Q70EL4|UBP43_HUMAN Ubiquitin carboxyl-terminal hydrolase 43 OS=Homo sapiens GN=USP43 PE=1 SV=2//0	DOWN	134.048	357.747	-1.4162	0.00015795	0.018302
CI01000302_00877590_00889734	other genes related to immune response	ubiquitin related	>ref|XP_016361913.1| LOW QUALITY PROTEIN: ubiquitin carboxyl-terminal hydrolase 34-like [Sinocyclocheilus anshuiensis]	sp|Q70CQ2|UBP34_HUMAN Ubiquitin carboxyl-terminal hydrolase 34 OS=Homo sapiens GN=USP34 PE=1 SV=2//0	DOWN	75.7567	279.859	-1.8853	5.2445e-06	0.0016829
CI01000081_00036237_00048055	other genes related to immune response	ubiquitin related	>ref|XP_016311270.1| ubiquitin carboxyl-terminal hydrolase 2-like isoform X2 [Sinocyclocheilus anshuiensis]	sp|Q2KHV7|UBP2_BOVIN Ubiquitin carboxyl-terminal hydrolase 2 OS=Bos taurus GN=USP2 PE=2 SV=1//4.88176e-151	DOWN	176.156	819.129	-2.2172	1.1024e-09	2.3437e-06
CI01000300_09489606_09526752	pattern recognition	LPS-anchor protein	>ref|XP_016145038.1| lipopolysaccharide-responsive and beige-like anchor protein isoform X6 [Sinocyclocheilus grahami]	sp|Q9ESE1|LRBA_MOUSE Lipopolysaccharide-responsive and beige-like anchor protein OS=Mus musculus GN=Lrba PE=1 SV=1//2.12681e-80	DOWN	96.7564	244.543	-1.3377	0.00057843	0.042304
CI01000300_09573524_09575634	pattern recognition	LPS-anchor protein	>gb|KTG43709.1| hypothetical protein cypCar_00016201, partial [Cyprinus carpio]	sp|P50851|LRBA_HUMAN Lipopolysaccharide-responsive and beige-like anchor protein OS=Homo sapiens GN=LRBA PE=1 SV=4//2.19506e-60	DOWN	87.7933	276.956	-1.6575	2.9298e-05	0.0054458
CI01000343_01527554_01571342	pattern recognition	LRR-containing proteins	>ref|XP_016307789.1| leucine-rich repeat serine/threonine-protein kinase 1-like [Sinocyclocheilus anshuiensis]	sp|Q3UHC2|LRRK1_MOUSE Leucine-rich repeat serine/threonine-protein kinase 1 OS=Mus musculus GN=Lrrk1 PE=2 SV=1//0	DOWN	153.994	373.024	-1.2764	0.00048738	0.038256
CI01000059_04542374_04554071	pattern recognition	LRR-containing proteins	>gb|KTG36890.1| hypothetical protein cypCar_00023638 [Cyprinus carpio]	sp|B0R160|LRWD1_DANRE Leucine-rich repeat and WD repeat-containing protein 1 OS=Danio rerio GN=lrwd1 PE=1 SV=1//0	DOWN	36.4184	133.852	-1.8779	2.9552e-05	0.0054631
CI01000325_03102298_03105905	pattern recognition	LRR-containing proteins	>ref|XP_016427420.1| leucine-rich repeat-containing protein 66-like [Sinocyclocheilus rhinocerous]	sp|Q68CR7|LRC66_HUMAN Leucine-rich repeat-containing protein 66 OS=Homo sapiens GN=LRRC66 PE=2 SV=1//1.00462e-12	DOWN	63.0137	234.665	-1.8969	0.00049311	0.038302
CI01000024_07027099_07031622	T/B cell antigen activation	BCL	>emb|CDQ91765.1| unnamed protein product, partial [Oncorhynchus mykiss]	sp|Q9H165|BC11A_HUMAN B-cell lymphoma/leukemia 11A OS=Homo sapiens GN=BCL11A PE=1 SV=2//1.25547e-12	DOWN	192.57	599.312	-1.6379	7.9974e-06	0.0022298
CI01000024_07008105_07012683	T/B cell antigen activation	BCL	>gb|KTG03859.1| hypothetical protein cypCar_00019831, partial [Cyprinus carpio]	sp|Q9H165|BC11A_HUMAN B-cell lymphoma/leukemia 11A OS=Homo sapiens GN=BCL11A PE=1 SV=2//1.6286e-30	DOWN	29.1477	103.96	-1.8346	4.539e-05	0.0076814
CI01000357_00531041_00537985	T/B cell antigen activation	NFAT	>ref|XP_016411160.1| nuclear factor of activated T-cells 5-like isoform X2 [Sinocyclocheilus rhinocerous]	sp|O94916|NFAT5_HUMAN Nuclear factor of activated T-cells 5 OS=Homo sapiens GN=NFAT5 PE=1 SV=1//6.14724e-06	DOWN	207.519	483.563	-1.2205	0.00060587	0.043386
CI01000028_06079297_06089526	T/B cell antigen activation	SEMA	>ref|XP_016132141.1| semaphorin-6D-like isoform X1 [Sinocyclocheilus grahami] ref|XP_016132142.1|	sp|Q8NFY4|SEM6D_HUMAN Semaphorin-6D OS=Homo sapiens GN=SEMA6D PE=2 SV=1//0	DOWN	1569.63	4007.42	-1.3522	5.766e-05	0.0089557
