# Supplementary material for: Integrative Transcriptomic and microRNAomic Profiling Reveals Immune Mechanism for the Resilience to Soybean Meal Stress in Fish Gut and Liver
Source: Front Physiol. 2018 Sep 10;9:1154. doi: 10.3389/fphys.2018.01154 (PMC6140834; doi:10.3389/fphys.2018.01154)
Supplement: Supplementary file 5 [file Table_5.XLSX]

## Sheet: liver 3w vs 0d up
Gene ID	immune Process	Immune gene categery	Blasted with NR	Blasted with SWISS PROT	State	readcount_liv_4	readcount_liv_3	log2FoldChange	pval	padj
CI01000191_00810914_00830686	acute phase reactions	macroglobulin	>dbj|BAA85038.1| alpha-2-macroglobulin-1 [Cyprinus carpio]	sp|P06238|A2MG_RAT Alpha-2-macroglobulin OS=Rattus norvegicus GN=A2m PE=2 SV=2//0	UP	37125.3	11063.3	1.7466	9.9765e-06	0.0025937
CI01000072_04665875_04678048	acute phase reactions	macroglobulin	>dbj|BAA85038.1| alpha-2-macroglobulin-1 [Cyprinus carpio]	sp|Q5R4N8|A2MG_PONAB Alpha-2-macroglobulin OS=Pongo abelii GN=A2M PE=2 SV=1//3.92169e-29	UP	5375.88	1719.41	1.6446	4.2695e-05	0.0073057
CI01000066_00159322_00159696	adapters effectors and signal transducers	perforin 1	>ref|NP_001076399.1| uncharacterized protein LOC799298 precursor [Danio rerio] emb|CAI11881.1|	sp|P35763|PERF_RAT Perforin-1 OS=Rattus norvegicus GN=Prf1 PE=2 SV=1//1.57289e-13	UP	4987.89	1189.66	2.0679	6.1124e-07	0.00025625
CI01000186_00156270_00161766	antigen processing and regulators	LRMP	>ref|XP_005168344.1| lymphoid-restricted membrane protein-like isoform X1 [Danio rerio] ref|XP_009294055.1|	sp|Q5RHB5|LRMP_DANRE Lymphoid-restricted membrane protein OS=Danio rerio GN=lrmp PE=1 SV=2//1.80571e-24	UP	302.33	23.3964	3.6918	3.2738e-07	0.00015464
CI01000146_02278636_02311063	antigen processing and regulators	MHC II	>gb|AAA50044.1| MHC class II DA-beta-2*01, partial [Danio rerio]	sp|P04231|HB23_MOUSE H-2 class II histocompatibility antigen, E-S beta chain (Fragment) OS=Mus musculus GN=H2-Eb1 PE=1 SV=1//2.1927e-31	UP	196.662	0.310212	9.3082	0.00013879	0.016683
CI01000146_02272881_02275284	antigen processing and regulators	MHC II	>gb|ABW37740.1| MHC class II alpha antigen [Ctenopharyngodon idella]	sp|P15981|HA2D_PIG SLA class II histocompatibility antigen, DQ haplotype D alpha chain OS=Sus scrofa PE=2 SV=1//8.41255e-20	UP	416.263	1.24763	8.3822	0.0001175	0.014595
CI01000141_00426082_00431703	complement system	C1q	>gb|KTF73815.1| hypothetical protein cypCar_00044821 [Cyprinus carpio]	sp|Q4ZJM9|C1QL4_MOUSE Complement C1q-like protein 4 OS=Mus musculus GN=C1ql4 PE=1 SV=1//1.17018e-06	UP	560.754	33.3522	4.0715	2.9794e-05	0.0056454
Novel01025	complement system	C1q and TNF related protein	PREDICTED: complement C1q tumor necrosis factor-related protein 3-like [Oreochromis niloticus]	--	UP	1223.16	48.337	4.6613	2.6989e-05	0.0053245
CI01000339_00214390_00215412	inflammatory cytokines and receptors	chemokine receptor	>ref|XP_016409371.1| chemokine-like receptor 1 [Sinocyclocheilus rhinocerous]	sp|P97468|CML1_MOUSE Chemokine-like receptor 1 OS=Mus musculus GN=Cmklr1 PE=1 SV=1//7.91539e-68	UP	36.9445	6.2591	2.5613	0.0001072	0.01367
CI01000413_00082928_00091538	inflammatory cytokines and receptors	GVIN	>ref|XP_016114184.1| interferon-induced very large GTPase 1-like [Sinocyclocheilus grahami]	sp|Q7Z2Y8|GVIN1_HUMAN Interferon-induced very large GTPase 1 OS=Homo sapiens GN=GVINP1 PE=2 SV=2//0	UP	212.986	2.19182	6.6025	0.00057145	0.045356
CI01000030_10971452_10974167	other genes related to immune response	myeloid cell related	>ref|XP_016392937.1| myeloid-derived growth factor-like [Sinocyclocheilus rhinocerous]	sp|Q9CPT4|MYDGF_MOUSE Myeloid-derived growth factor OS=Mus musculus GN=Mydgf PE=1 SV=1//6.11655e-40	UP	122.967	40.1656	1.6142	0.00053021	0.043056
CI01000049_07723874_07725512	pattern recognition	C-type lectin	>gb|AEH76775.1| C-type lectin 1 [Ctenopharyngodon idella]	sp|Q02988|LECA_PLEWA Lectin OS=Pleurodeles waltl GN=LEC PE=1 SV=1//3.06849e-18	UP	163.983	37.379	2.1332	5.1192e-06	0.0015751
CI01000039_07523213_07573865	pattern recognition	LRR-containing proteins	>ref|XP_009299962.1| leucine-rich repeat and calponin homology domain-containing protein 2 isoform X2 [Danio rerio]	sp|Q5VUJ6|LRCH2_HUMAN Leucine-rich repeat and calponin homology domain-containing protein 2 OS=Homo sapiens GN=LRCH2 PE=2 SV=2//0	UP	127.584	21.8369	2.5466	3.1337e-07	0.00015231
CI01000386_00088836_00095477	pattern recognition	nattectin	>ref|XP_016332027.1| galactose-specific lectin nattectin-like isoform X2 [Sinocyclocheilus anshuiensis]	sp|Q66S03|LECG_THANI Galactose-specific lectin nattectin OS=Thalassophryne nattereri PE=1 SV=1//6.34109e-20	UP	78.9053	15.6487	2.3341	1.1047e-05	0.00285
CI01000334_00002698_00003642	T/B cell antigen activation	Ig light chain	>gb|AEH76778.1| immunoglobulin light chain L2, partial [Ctenopharyngodon idella]	sp|P15814|IGLL1_HUMAN Immunoglobulin lambda-like polypeptide 1 OS=Homo sapiens GN=IGLL1 PE=1 SV=1//1.4134e-13	UP	69.2421	12.1769	2.5075	0.00051109	0.04191

## Sheet: liver 3w vs 0d down
Gene ID	immune Process	Immune gene categery	Blasted with NR	Blasted with SWISS PROT	State	readcount_liv_4	readcount_liv_3	log2FoldChange	pval	padj
CI01000029_09284343_09295992	adapters effectors and signal transducers	MAPK related	>ref|XP_016372852.1| mitogen-activated protein kinase-binding protein 1-like isoform X3 [Sinocyclocheilus rhinocerous]	sp|Q6DFF9|MABP1_XENLA Mitogen-activated protein kinase-binding protein 1 OS=Xenopus laevis GN=mapkbp1 PE=2 SV=1//0	DOWN	0.944173	44.0023	-5.5424	6.0162e-10	1.062e-06
CI01000053_01759982_01765920	adapters effectors and signal transducers	NFKBI and related	>gb|KTF76606.1| hypothetical protein cypCar_00031093 [Cyprinus carpio]	sp|Q9EST8|IKBZ_MOUSE NF-kappa-B inhibitor zeta OS=Mus musculus GN=Nfkbiz PE=1 SV=1//1.84905e-36	DOWN	0.701447	15.6184	-4.4768	0.00025902	0.025661
CI01000020_00798124_00809552	adapters effectors and signal transducers	PPARA	>ref|XP_016399949.1| peroxisome proliferator-activated receptor alpha-like isoform X1 [Sinocyclocheilus rhinocerous]	sp|Q07869|PPARA_HUMAN Peroxisome proliferator-activated receptor alpha OS=Homo sapiens GN=PPARA PE=1 SV=2//2.21826e-178	DOWN	1438.12	4192.64	-1.5437	0.00012391	0.015143
CI01000004_07388945_07408147	antigen processing and regulators	TGF, TGF receptor and related	>gb|ADK26459.1| activin receptor-like kinase 5 [Ctenopharyngodon idella]	sp|P80204|TGFR1_RAT TGF-beta receptor type-1 OS=Rattus norvegicus GN=Tgfbr1 PE=1 SV=1//0	DOWN	548.187	1445.67	-1.399	0.00045799	0.038788
CI01000001_01637015_01638058	inflammatory cytokines and receptors	FAM	>ref|XP_016103421.1| protein FAM43B-like [Sinocyclocheilus grahami]	sp|Q6ZT52|FA43B_HUMAN Protein FAM43B OS=Homo sapiens GN=FAM43B PE=2 SV=1//4.7895e-91	DOWN	0	11.2454	#NAME?	0.00017951	0.01976
CI01000009_12715240_12852745	inflammatory cytokines and receptors	TTN/TITIN	>ref|XP_016379120.1| LOW QUALITY PROTEIN: titin-like [Sinocyclocheilus rhinocerous]	sp|A2ASS6|TITIN_MOUSE Titin OS=Mus musculus GN=Ttn PE=1 SV=1//9.21845e-06	DOWN	0.944173	34.0286	-5.1716	0.00010237	0.013307
CI01000009_12863333_13023317	inflammatory cytokines and receptors	TTN/TITIN	>ref|XP_015247162.1| titin [Cyprinodon variegatus]	sp|A2ASS6|TITIN_MOUSE Titin OS=Mus musculus GN=Ttn PE=1 SV=1//9.61203e-06	DOWN	0.578496	30.5683	-5.7236	1.2789e-07	7.7988e-05
CI01000026_10347872_10351783	other genes related to immune response	CEBP	>gb|KTG31918.1| hypothetical protein cypCar_00001286, partial [Cyprinus carpio]	sp|P49715|CEBPA_HUMAN CCAAT/enhancer-binding protein alpha OS=Homo sapiens GN=CEBPA PE=1 SV=3//5.95908e-69	DOWN	1405.71	6219.03	-2.1454	8.2426e-06	0.0022475
CI01000296_00003088_00028142	other genes related to immune response	DMBT	>emb|CAI11836.1| novel protein containing multiple scavenger receptor cysteine-rich (SRCR) domains similar to vertebrate deleted in malignant brain tumors 1 (DMBT1), partial [Danio rerio]	sp|Q9UGM3|DMBT1_HUMAN Deleted in malignant brain tumors 1 protein OS=Homo sapiens GN=DMBT1 PE=1 SV=2//1.47546e-24	DOWN	7.94187	48.642	-2.6147	2.464e-05	0.0050797
CI01000306_01329678_01378388	other genes related to immune response	microtubule-associated	>ref|XP_016143625.1| echinoderm microtubule-associated protein-like 6 isoform X3 [Sinocyclocheilus grahami]	sp|Q6ZMW3|EMAL6_HUMAN Echinoderm microtubule-associated protein-like 6 OS=Homo sapiens GN=EML6 PE=2 SV=2//1.66446e-06	DOWN	0.412198	16.8364	-5.3521	5.5103e-05	0.0086356
CI01000050_00851621_00899726	other genes related to immune response	ubiquitin ligase	>ref|XP_016354924.1| E3 ubiquitin-protein ligase MIB2-like isoform X1 [Sinocyclocheilus anshuiensis]	sp|Q5ZIJ9|MIB2_CHICK E3 ubiquitin-protein ligase MIB2 OS=Gallus gallus GN=MIB2 PE=2 SV=1//0	DOWN	371.486	1008.98	-1.4415	0.00035364	0.032004
CI01000325_04548811_04554697	other genes related to immune response	ubiquitin ligase	>gb|KTG05490.1| hypothetical protein cypCar_00020976 [Cyprinus carpio]	sp|Q28DS3|RN170_XENTR E3 ubiquitin-protein ligase RNF170 OS=Xenopus tropicalis GN=rnf170 PE=2 SV=1//1.42237e-26	DOWN	55.5141	309.585	-2.4794	4.0062e-08	3.3235e-05
CI01000186_00281889_00289711	other genes related to immune response	ubiquitin ligase	>gb|KTG02877.1| hypothetical protein cypCar_00042027 [Cyprinus carpio]	sp|Q9UPQ7|PZRN3_HUMAN E3 ubiquitin-protein ligase PDZRN3 OS=Homo sapiens GN=PDZRN3 PE=1 SV=2//4.56429e-11	DOWN	1.845	23.0705	-3.6444	4.9933e-05	0.0082434
CI01000063_05783589_05833813	other genes related to immune response	ubiquitin related	>ref|XP_016355398.1| inactive ubiquitin carboxyl-terminal hydrolase 54-like isoform X1 [Sinocyclocheilus anshuiensis]	sp|Q70EL1|UBP54_HUMAN Inactive ubiquitin carboxyl-terminal hydrolase 54 OS=Homo sapiens GN=USP54 PE=1 SV=4//8.12998e-07	DOWN	0.867745	18.7269	-4.4317	8.7664e-05	0.011884
CI01059759_00000848_00004333	pattern recognition	LRR-containing proteins	>ref|XP_016407698.1| leucine-rich repeat-containing protein 49 [Sinocyclocheilus rhinocerous]	sp|Q8IUZ0|LRC49_HUMAN Leucine-rich repeat-containing protein 49 OS=Homo sapiens GN=LRRC49 PE=2 SV=2//1.37888e-21	DOWN	0	13.7241	#NAME?	3.1113e-05	0.0057508
CI01000000_03630643_03637287	pattern recognition	LRR-containing proteins	>gb|KTG44776.1| hypothetical protein cypCar_00017313 [Cyprinus carpio]	sp|O43300|LRRT2_HUMAN Leucine-rich repeat transmembrane neuronal protein 2 OS=Homo sapiens GN=LRRTM2 PE=2 SV=3//0	DOWN	0.777874	13.712	-4.1398	0.00052919	0.043056
CI01000077_00197568_00202190	pattern recognition	LRR-containing proteins	>ref|XP_016389590.1| leucine-rich repeat and immunoglobulin-like domain-containing nogo receptor-interacting protein 3 [Sinocyclocheilus rhinocerous]	sp|P0C6S8|LIGO3_HUMAN Leucine-rich repeat and immunoglobulin-like domain-containing nogo receptor-interacting protein 3 OS=Homo sapiens GN=LINGO3 PE=3 SV=1//0	DOWN	0.412198	16.5355	-5.3261	2.8682e-05	0.0055603
CI01000040_01002406_01015284	pattern recognition	MMR	>ref|XP_016403789.1| uncharacterized protein LOC107736914 [Sinocyclocheilus rhinocerous]	sp|P22897|MRC1_HUMAN Macrophage mannose receptor 1 OS=Homo sapiens GN=MRC1 PE=1 SV=1//7.77107e-09	DOWN	15.2858	62.9757	-2.0426	0.00032064	0.029976
CI01000155_00531804_00553044	T/B cell antigen activation	SEMA	>ref|XP_016306130.1| semaphorin-6A-like isoform X3 [Sinocyclocheilus anshuiensis]	sp|O35464|SEM6A_MOUSE Semaphorin-6A OS=Mus musculus GN=Sema6a PE=1 SV=2//0	DOWN	46.3417	143.174	-1.6274	0.00038086	0.033526
CI01000020_05792886_05813941	T/B cell antigen activation	SEMA	>gb|KTG47061.1| hypothetical protein cypCar_00002256, partial [Cyprinus carpio]	sp|Q9W7J1|SE3AA_DANRE Semaphorin-3aa OS=Danio rerio GN=sema3aa PE=2 SV=1//2.61234e-31	DOWN	1.50923	16.5332	-3.4535	0.00059791	0.0469

## Sheet: liver 5w vs 3w up
Gene ID	immune Process	Immune gene categery	Blasted with NR	Blasted with SWISS PROT	State	readcount_liv_4	readcount_liv_3	log2FoldChange	pval	padj
CI01000030_06940324_06983295	adapters effectors and signal transducers	CD276	>ref|XP_016420279.1| uncharacterized protein LOC107749630 [Sinocyclocheilus rhinocerous]	sp|Q68EV1|CD276_XENLA CD276 antigen homolog OS=Xenopus laevis GN=cd276 PE=2 SV=1//3.158e-08	UP	36.9645	7.93052	2.2207	0.00028319	0.022963
CI01000319_06316911_06319511	antigen processing and regulators	CDK and related	>ref|XP_016425151.1| cyclin-dependent kinases regulatory subunit 1 [Sinocyclocheilus rhinocerous] ref|XP_016396112.1|	sp|P61025|CKS1_MOUSE Cyclin-dependent kinases regulatory subunit 1 OS=Mus musculus GN=Cks1b PE=3 SV=1//5.60246e-36	UP	25.5127	0.545998	5.5462	0.00010937	0.011835
CI01000142_00497199_00499022	antigen processing and regulators	HA2	>ref|XP_016428062.1| H-2 class II histocompatibility antigen, I-E beta chain-like [Sinocyclocheilus rhinocerous]	sp|P18469|HB2J_MOUSE H-2 class II histocompatibility antigen, I-E beta chain OS=Mus musculus GN=H2-Eb1 PE=1 SV=1//6.54616e-34	UP	34.8313	6.27898	2.4718	0.00071657	0.045504
CI01000004_12390372_12391923	inflammatory cytokines and receptors	CCR	>ref|XP_016120670.1| C-C chemokine receptor type 9-like [Sinocyclocheilus grahami]	sp|Q9WUT7|CCR9_MOUSE C-C chemokine receptor type 9 OS=Mus musculus GN=Ccr9 PE=2 SV=1//3.1621e-100	UP	290.102	95.4032	1.6045	8.1575e-05	0.0093707
CI01000152_02440117_02451100	inflammatory cytokines and receptors	FAM	>ref|XP_016396773.1| protein FAM102B-like [Sinocyclocheilus rhinocerous]	sp|Q5T8I3|F102B_HUMAN Protein FAM102B OS=Homo sapiens GN=FAM102B PE=1 SV=2//1.06513e-99	UP	77.913	24.3089	1.6804	0.00031711	0.025261
CI01000304_06725873_06727044	inflammatory cytokines and receptors	FAM	>gb|KTF77097.1| hypothetical protein cypCar_00024440 [Cyprinus carpio]	sp|Q6PBU0|F136A_DANRE Protein FAM136A OS=Danio rerio GN=fam136a PE=2 SV=1//1.55716e-68	UP	244.847	103.036	1.2487	0.00041991	0.031325
CI01054958_00000579_00000811	inflammatory cytokines and receptors	integrin beta	>ref|XP_016402275.1| integrin beta-1-like, partial [Sinocyclocheilus rhinocerous]	sp|P49134|ITB1_RAT Integrin beta-1 OS=Rattus norvegicus GN=Itgb1 PE=2 SV=1//7.36668e-20	UP	312.149	119.314	1.3875	6.0178e-05	0.0076209
CI01000173_00285596_00297618	innate immune cells related	MMD	>ref|XP_016351188.1| monocyte to macrophage differentiation factor-like isoform X2 [Sinocyclocheilus anshuiensis]	sp|Q15546|PAQRB_HUMAN Monocyte to macrophage differentiation factor OS=Homo sapiens GN=MMD PE=2 SV=2//7.11306e-124	UP	989.451	361.096	1.4542	2.87e-06	0.00077771
CI01000026_10347872_10351783	other genes related to immune response	CEBP	>gb|KTG31918.1| hypothetical protein cypCar_00001286, partial [Cyprinus carpio]	sp|P49715|CEBPA_HUMAN CCAAT/enhancer-binding protein alpha OS=Homo sapiens GN=CEBPA PE=1 SV=3//5.95908e-69	UP	3488.18	1340.17	1.3801	0.00018998	0.017259
CI01000053_02891966_02895382	other genes related to immune response	HSP	>gb|KTG41410.1| hypothetical protein cypCar_00000819 [Cyprinus carpio]	sp|Q2TBX4|HSP13_BOVIN Heat shock 70 kDa protein 13 OS=Bos taurus GN=HSPA13 PE=2 SV=1//0	UP	114.29	42.564	1.425	0.00062956	0.041331
CI01000009_01981245_01988092	other genes related to immune response	HSP	>gb|ADU34083.1| 60 kDa heat shock protein [Ctenopharyngodon idella]	sp|Q5ZL72|CH60_CHICK 60 kDa heat shock protein, mitochondrial OS=Gallus gallus GN=HSPD1 PE=1 SV=1//0	UP	1637.29	662.777	1.3047	2.7352e-05	0.0042051
CI01000066_01339972_01347463	other genes related to immune response	HSP	>ref|XP_016302975.1| heat shock 70 kDa protein 14 [Sinocyclocheilus anshuiensis]	sp|Q5RGE6|HSP7E_DANRE Heat shock 70 kDa protein 14 OS=Danio rerio GN=hspa14 PE=2 SV=1//0	UP	220.494	91.9592	1.2617	0.00063395	0.041442
CI01000050_00851621_00899726	other genes related to immune response	ubiquitin ligase	>ref|XP_016354924.1| E3 ubiquitin-protein ligase MIB2-like isoform X1 [Sinocyclocheilus anshuiensis]	sp|Q5ZIJ9|MIB2_CHICK E3 ubiquitin-protein ligase MIB2 OS=Gallus gallus GN=MIB2 PE=2 SV=1//0	UP	755.35	354.049	1.0932	0.00075316	0.046909
CI01000304_17584110_17585466	pattern recognition	HMG	>gb|AAH45917.1| High-mobility group box 1 [Danio rerio] gb|AAI65307.1|	sp|P07746|HMGT_ONCMY High mobility group-T protein OS=Oncorhynchus mykiss PE=2 SV=2//2.13558e-88	UP	2305.03	841.049	1.4545	5.5959e-06	0.001334
CI01000040_04503393_04506409	pattern recognition	HMG	>ref|NP_001017769.1| high mobility group protein B3 [Danio rerio] gb|AAH93186.1|	sp|Q32L31|HMGB3_BOVIN High mobility group protein B3 OS=Bos taurus GN=HMGB3 PE=2 SV=2//9.65862e-68	UP	915.997	340.2	1.429	1.1775e-05	0.0022354
CI01000055_04974453_04978406	pattern recognition	LRR-containing proteins	>ref|XP_016312242.1| F-box/LRR-repeat protein 2-like [Sinocyclocheilus anshuiensis]	sp|Q8WV35|LRC29_HUMAN Leucine-rich repeat-containing protein 29 OS=Homo sapiens GN=LRRC29 PE=1 SV=1//1.45054e-27	UP	63.7502	15.2683	2.0619	6.7844e-05	0.008273
CI01000055_02735304_02738366	pattern recognition	LRR-containing proteins	>ref|XP_016427810.1| leucine-rich repeat-containing protein 59 [Sinocyclocheilus rhinocerous] ref|XP_016427811.1|	sp|Q6NWG1|LRC59_DANRE Leucine-rich repeat-containing protein 59 OS=Danio rerio GN=lrrc59 PE=2 SV=1//2.71531e-23	UP	349.497	117.716	1.57	7.2786e-06	0.0015806
CI01161145_00000154_00000530	pattern recognition	scavenger receptor	>ref|XP_016349363.1| putative DMBT1-like protein, partial [Sinocyclocheilus anshuiensis]	sp|P85521|C163A_BOVIN Scavenger receptor cysteine-rich type 1 protein M130 OS=Bos taurus GN=CD163 PE=1 SV=2//1.10255e-09	UP	12.8359	0	Inf	5.8175e-05	0.0074977
CI01074159_00000084_00002350	pattern recognition	scavenger receptor	>ref|XP_017210622.1| scavenger receptor cysteine-rich type 1 protein M130 [Danio rerio]	sp|Q2VLG6|C163A_CANFA Scavenger receptor cysteine-rich type 1 protein M130 OS=Canis familiaris GN=CD163 PE=2 SV=1//3.57808e-31	UP	33.9672	0.272999	6.9591	0.00013799	0.014159
CI01114902_00000059_00000984	pattern recognition	scavenger receptor	>ref|XP_016414340.1| antigen WC1.1-like [Sinocyclocheilus rhinocerous]	sp|Q2VLG6|C163A_CANFA Scavenger receptor cysteine-rich type 1 protein M130 OS=Canis familiaris GN=CD163 PE=2 SV=1//6.32168e-13	UP	63.4779	16.0443	1.9842	0.00054753	0.037903

## Sheet: liver 5w vs 3w down
Gene ID	immune Process	Immune gene categery	Blasted with NR	Blasted with SWISS PROT	State	readcount_liv_4	readcount_liv_3	log2FoldChange	pval	padj
CI01000300_01381458_01383409	acute phase reactions	fibrinogen	>ref|XP_003197669.3| fibrinogen alpha chain-like [Danio rerio]	sp|P14448|FIBA_CHICK Fibrinogen alpha chain OS=Gallus gallus GN=FGA PE=1 SV=4//5.17068e-24	DOWN	196.994	801.467	-2.0245	0.00042396	0.031505
CI01000191_00810914_00830686	acute phase reactions	macroglobulin	>dbj|BAA85038.1| alpha-2-macroglobulin-1 [Cyprinus carpio]	sp|P06238|A2MG_RAT Alpha-2-macroglobulin OS=Rattus norvegicus GN=A2m PE=2 SV=2//0	DOWN	14475.1	35330.8	-1.2874	2.4242e-05	0.0039014
CI01000015_06426816_06439699	adapters effectors and signal transducers	Programmed cell death protein	>ref|XP_016379965.1| programmed cell death protein 4-like isoform X1 [Sinocyclocheilus rhinocerous]	sp|Q61823|PDCD4_MOUSE Programmed cell death protein 4 OS=Mus musculus GN=Pdcd4 PE=1 SV=1//4.82765e-135	DOWN	141.992	360.036	-1.3423	7.1213e-05	0.00852
CI01000016_04428669_04441464	adapters effectors and signal transducers	DEDD	>ref|XP_016379669.1| DNA-binding death effector domain-containing protein 2-like [Sinocyclocheilus rhinocerous]	sp|Q8WXF8|DEDD2_HUMAN DNA-binding death effector domain-containing protein 2 OS=Homo sapiens GN=DEDD2 PE=1 SV=1//3.58844e-67	DOWN	281.971	622.98	-1.1436	0.00073967	0.046346
CI01000186_00156270_00161766	antigen processing and regulators	LRMP	>ref|XP_005168344.1| lymphoid-restricted membrane protein-like isoform X1 [Danio rerio] ref|XP_009294055.1|	sp|Q5RHB5|LRMP_DANRE Lymphoid-restricted membrane protein OS=Danio rerio GN=lrmp PE=1 SV=2//1.80571e-24	DOWN	26.4364	288.316	-3.4471	1.2239e-06	0.00036265
CI01000020_07160189_07169882	antigen processing and regulators	VEGF	>ref|XP_016370350.1| vascular endothelial growth factor A-A-like isoform X5 [Sinocyclocheilus rhinocerous]	sp|O73682|VGFAA_DANRE Vascular endothelial growth factor A-A OS=Danio rerio GN=vegfaa PE=1 SV=1//1.92082e-08	DOWN	175.807	450.566	-1.3577	9.2525e-05	0.010293
CI01000342_00122943_00124004	complement system	C1q	>gb|KTF77486.1| hypothetical protein cypCar_00035389 [Cyprinus carpio]	sp|Q4ZJM9|C1QL4_MOUSE Complement C1q-like protein 4 OS=Mus musculus GN=C1ql4 PE=1 SV=1//3.29813e-12	DOWN	64.1773	203.492	-1.6648	3.5291e-05	0.0050533
CI01000181_00330804_00357644	complement system	C3	>gb|AAQ74974.1| complement C3 [Ctenopharyngodon idella]	sp|P98093|CO3_ONCMY Complement C3 (Fragment) OS=Oncorhynchus mykiss GN=c3 PE=1 SV=1//1.86581e-23	DOWN	118688	245275	-1.0472	0.00050096	0.035692
CI01000092_04458178_04481575	complement system	CFB	>gb|AFD18593.1| Bf/C2B [Ctenopharyngodon idella]	sp|P04186|CFAB_MOUSE Complement factor B OS=Mus musculus GN=Cfb PE=1 SV=2//1.55357e-116	DOWN	8094.08	17331.6	-1.0985	0.00063166	0.041378
CI01000039_04198172_04200073	inflammatory cytokines and receptors	FAM	>ref|XP_016089971.1| protein FAM222B-like [Sinocyclocheilus grahami] ref|XP_016089972.1|	sp|Q6P539|F222B_MOUSE Protein FAM222B OS=Mus musculus GN=Fam222b PE=2 SV=2//4.4991e-124	DOWN	40.1214	105.899	-1.4002	0.0005678	0.038685
CI01000009_03235111_03242103	inflammatory cytokines and receptors	ILDR	>ref|XP_016144083.1| immunoglobulin-like domain-containing receptor 1 [Sinocyclocheilus grahami] ref|XP_016144084.1|	sp|Q32NM7|ILDR1_XENLA Immunoglobulin-like domain-containing receptor 1 OS=Xenopus laevis GN=ildr1 PE=2 SV=1//5.90453e-87	DOWN	183.17	641.533	-1.8083	1.0958e-07	5.6264e-05
CI01000030_09598376_09634083	inflammatory cytokines and receptors	TTN/TITIN	>ref|XP_016116510.1| titin-like, partial [Sinocyclocheilus grahami]	-//-	DOWN	16.6076	71.1875	-2.0998	2.0785e-05	0.003476
CI01000020_04105843_04123658	innate immune cells related	NCAM	>ref|XP_016430208.1| neuronal cell adhesion molecule-like isoform X5 [Sinocyclocheilus rhinocerous]	sp|P35331|NRCAM_CHICK Neuronal cell adhesion molecule OS=Gallus gallus PE=1 SV=1//0	DOWN	109.67	263.911	-1.2669	0.0004457	0.03256
CI01000255_00197338_00204060	other genes related to immune response	GIAMP	>ref|XP_016392286.1| GTPase IMAP family member 7-like [Sinocyclocheilus rhinocerous]	sp|Q8NHV1|GIMA7_HUMAN GTPase IMAP family member 7 OS=Homo sapiens GN=GIMAP7 PE=1 SV=1//4.8467e-44	DOWN	0	56.5814	#NAME?	1.9351e-16	5.5775e-13
CI01000255_00208007_00210331	other genes related to immune response	GIAMP	>ref|XP_009297299.1| GTPase IMAP family member 8-like [Danio rerio]	sp|Q75N62|GIMA8_MOUSE GTPase IMAP family member 8 OS=Mus musculus GN=Gimap8 PE=2 SV=1//1.86397e-37	DOWN	0	65.12	#NAME?	2.0307e-18	8.0477e-15
CI01000024_00214865_00216937	other genes related to immune response	GIAMP	>gb|KTG31212.1| hypothetical protein cypCar_00035950 [Cyprinus carpio]	sp|Q8K3K9|GIMA4_RAT GTPase IMAP family member 4 OS=Rattus norvegicus GN=Gimap4 PE=2 SV=1//4.16245e-12	DOWN	45.3484	134.777	-1.5714	0.00068471	0.044109
CI01000255_00211714_00212715	other genes related to immune response	GIAMP	>ref|XP_016398206.1| GTPase IMAP family member 7-like, partial [Sinocyclocheilus rhinocerous]	sp|Q96F15|GIMA5_HUMAN GTPase IMAP family member 5 OS=Homo sapiens GN=GIMAP5 PE=1 SV=1//1.241e-33	DOWN	2.42017	75.3048	-4.9596	2.3772e-14	5.0246e-11
CI01000029_02593889_02603627	other genes related to immune response	HSP	>ref|XP_016378948.1| heat shock factor protein 2-like [Sinocyclocheilus rhinocerous]	sp|P38530|HSF2_CHICK Heat shock factor protein 2 OS=Gallus gallus GN=HSF2 PE=2 SV=1//5.12557e-80	DOWN	295.877	657.458	-1.1519	0.00070888	0.04513
CI01000223_00069358_00073284	other genes related to immune response	platelet related	>ref|XP_016370567.1| serine-rich adhesin for platelets-like [Sinocyclocheilus rhinocerous]	-//-	DOWN	432.04	1145.21	-1.4064	1.9301e-05	0.0032724
CI01000057_00631558_00652724	other genes related to immune response	ubiquitin ligase	>ref|XP_017213748.1| uncharacterized protein si:dkey-40c23.3 isoform X1 [Danio rerio]	sp|Q8TDB6|DTX3L_HUMAN E3 ubiquitin-protein ligase DTX3L OS=Homo sapiens GN=DTX3L PE=1 SV=1//1.35931e-51	DOWN	221.11	491.993	-1.1539	0.00047019	0.033881
CI01000046_01047300_01066367	other genes related to immune response	ubiquitin ligase	>ref|XP_016361454.1| putative E3 ubiquitin-protein ligase UNKL isoform X1 [Sinocyclocheilus anshuiensis]	sp|Q5FWH2|UNKL_MOUSE Putative E3 ubiquitin-protein ligase UNKL OS=Mus musculus GN=Unkl PE=2 SV=2//1.24823e-11	DOWN	122.857	283.854	-1.2082	0.0006797	0.04389
CI01000171_00167413_00206328	other genes related to immune response	ubiquitin ligase	>ref|XP_016296820.1| E3 ubiquitin-protein ligase RNF43-like [Sinocyclocheilus anshuiensis]	sp|Q5NCP0|RNF43_MOUSE E3 ubiquitin-protein ligase RNF43 OS=Mus musculus GN=Rnf43 PE=2 SV=1//3.37777e-12	DOWN	36.9199	112.755	-1.6107	0.00011711	0.012418
CI01000080_04371959_04376923	pattern recognition	LRR-containing proteins	>ref|XP_016309932.1| F-box/LRR-repeat protein 3-like [Sinocyclocheilus anshuiensis]	sp|Q9UKT7|FBXL3_HUMAN F-box/LRR-repeat protein 3 OS=Homo sapiens GN=FBXL3 PE=1 SV=1//0	DOWN	154.508	426.562	-1.4651	0.00017946	0.016735
CI01000039_07523213_07573865	pattern recognition	LRR-containing proteins	>ref|XP_009299962.1| leucine-rich repeat and calponin homology domain-containing protein 2 isoform X2 [Danio rerio]	sp|Q5VUJ6|LRCH2_HUMAN Leucine-rich repeat and calponin homology domain-containing protein 2 OS=Homo sapiens GN=LRCH2 PE=2 SV=2//0	DOWN	33.9847	121.469	-1.8376	8.7882e-06	0.0018331
CI01000386_00088836_00095477	pattern recognition	nattectin	>ref|XP_016332027.1| galactose-specific lectin nattectin-like isoform X2 [Sinocyclocheilus anshuiensis]	sp|Q66S03|LECG_THANI Galactose-specific lectin nattectin OS=Thalassophryne nattereri PE=1 SV=1//6.34109e-20	DOWN	20.6897	75.0916	-1.8597	8.2862e-05	0.0094843
CI01000095_01699194_01700598	pattern recognition	nattectin	>gb|KTF88117.1| hypothetical protein cypCar_00026293 [Cyprinus carpio]	sp|Q66S03|LECG_THANI Galactose-specific lectin nattectin OS=Thalassophryne nattereri PE=1 SV=1//4.00369e-25	DOWN	25.8794	98.6852	-1.931	1.1197e-05	0.0021575
CI01000386_00004162_00036608	pattern recognition	nattectin	>ref|XP_016332027.1| galactose-specific lectin nattectin-like isoform X2 [Sinocyclocheilus anshuiensis]	sp|Q66S03|LECG_THANI Galactose-specific lectin nattectin OS=Thalassophryne nattereri PE=1 SV=1//1.42271e-21	DOWN	5.28252	36.3385	-2.7822	3.3335e-05	0.004848
CI01000086_02387094_02397102	pattern recognition	NOD	>gb|ACX71752.1| nucleotide-binding oligomerization domain-1 [Ctenopharyngodon idella] gb|ADB92611.1|	sp|Q9Y239|NOD1_HUMAN Nucleotide-binding oligomerization domain-containing protein 1 OS=Homo sapiens GN=NOD1 PE=1 SV=1//0	DOWN	98.6053	279.002	-1.5005	2.5371e-05	0.0040241

## Sheet: liver 7w vs 5w up
Gene ID	immune Process	Immune gene categery	Blasted with NR	Blasted with SWISS PROT	State	readcount_liv_4	readcount_liv_3	log2FoldChange	pval	padj
CI01000300_01384469_01386368	acute phase reactions	fibrinogen	>ref|XP_016432191.1| fibrinogen alpha chain-like [Sinocyclocheilus rhinocerous]	sp|P14448|FIBA_CHICK Fibrinogen alpha chain OS=Gallus gallus GN=FGA PE=1 SV=4//1.10355e-11	UP	413841	170582	1.2786	7.412e-06	0.0011413
CI01000300_01387744_01388660	acute phase reactions	fibrinogen	>ref|XP_016375380.1| fibrinogen alpha chain-like [Sinocyclocheilus rhinocerous]	sp|P02672|FIBA_BOVIN Fibrinogen alpha chain OS=Bos taurus GN=FGA PE=1 SV=5//5.75406e-23	UP	74504.3	31409.9	1.2461	1.3423e-05	0.0018947
CI01000300_10370185_10373703	acute phase reactions	fibrinogen	>gb|ADF97606.1| fibrinogen gamma polypeptide [Hypophthalmichthys molitrix]	sp|P02679|FIBG_HUMAN Fibrinogen gamma chain OS=Homo sapiens GN=FGG PE=1 SV=3//7.31785e-155	UP	344524	149860	1.201	3.2093e-05	0.0037151
CI01000300_01373306_01377544	acute phase reactions	fibrinogen	>ref|XP_016347281.1| fibrinogen beta chain-like [Sinocyclocheilus anshuiensis]	sp|P02675|FIBB_HUMAN Fibrinogen beta chain OS=Homo sapiens GN=FGB PE=1 SV=2//0	UP	417859	189142	1.1435	6.493e-05	0.0064893
CI01000072_04635652_04646429	acute phase reactions	macroglobulin	>ref|XP_016128994.1| alpha-2-macroglobulin-like [Sinocyclocheilus grahami]	sp|P06238|A2MG_RAT Alpha-2-macroglobulin OS=Rattus norvegicus GN=A2m PE=2 SV=2//1.0311e-52	UP	39565.6	10608.4	1.899	1.2966e-10	1.0981e-07
CI01000191_00810914_00830686	acute phase reactions	macroglobulin	>dbj|BAA85038.1| alpha-2-macroglobulin-1 [Cyprinus carpio]	sp|P06238|A2MG_RAT Alpha-2-macroglobulin OS=Rattus norvegicus GN=A2m PE=2 SV=2//0	UP	43475.6	15533.8	1.4848	0.00012808	0.010762
CI01000340_10252718_10253859	adapters effectors and signal transducers	CISH	>gb|ADC54227.1| cytokine-inducible Src homology 2 [Ctenopharyngodon idella]	sp|Q9PW70|CISH_CHICK Cytokine-inducible SH2-containing protein OS=Gallus gallus GN=CISH PE=2 SV=1//2.27282e-47	UP	1597.57	95.101	4.0703	2.7939e-08	1.0833e-05
CI01000344_00182618_00199388	adapters effectors and signal transducers	MAPK related	>ref|NP_001035448.1| mitogen-activated protein kinase kinase kinase kinase 2 [Danio rerio] gb|AAI15222.1|	sp|Q61161|M4K2_MOUSE Mitogen-activated protein kinase kinase kinase kinase 2 OS=Mus musculus GN=Map4k2 PE=1 SV=1//0	UP	738.46	290.646	1.3453	1.204e-05	0.0017352
CI01000029_07405933_07416452	adapters effectors and signal transducers	NFKBI and related	>ref|XP_016317131.1| NF-kappa-B inhibitor epsilon-like [Sinocyclocheilus anshuiensis]	sp|O00221|IKBE_HUMAN NF-kappa-B inhibitor epsilon OS=Homo sapiens GN=NFKBIE PE=1 SV=3//1.70406e-65	UP	369.894	172.29	1.1023	0.00055693	0.034074
CI01111151_00000032_00007658	adapters effectors and signal transducers	NLRC3	>ref|XP_016104921.1| protein NLRC3-like [Sinocyclocheilus grahami]	sp|Q7RTR2|NLRC3_HUMAN Protein NLRC3 OS=Homo sapiens GN=NLRC3 PE=2 SV=2//1.01495e-42	UP	94.3059	25.0912	1.9102	1.35e-05	0.0018971
CI01000186_00165206_00167364	adapters effectors and signal transducers	PPARA	>ref|XP_016314835.1| peroxisome proliferator-activated receptor delta-like [Sinocyclocheilus anshuiensis]	sp|Q03181|PPARD_HUMAN Peroxisome proliferator-activated receptor delta OS=Homo sapiens GN=PPARD PE=1 SV=1//0	UP	2057.95	539.381	1.9318	1.4378e-10	1.1564e-07
CI01000093_00116357_00121990	adapters effectors and signal transducers	RIP	>ref|XP_016130869.1| nuclear receptor-interacting protein 1-like [Sinocyclocheilus grahami] ref|XP_016130878.1|	sp|P48552|NRIP1_HUMAN Nuclear receptor-interacting protein 1 OS=Homo sapiens GN=NRIP1 PE=1 SV=2//1.30707e-32	UP	340.239	119.066	1.5148	3.7525e-06	0.00066278
CI01000161_00162338_00163205	adapters effectors and signal transducers	TRAF related	>gb|AAQ74975.2| TRAF2-binding protein [Ctenopharyngodon idella]	sp|A2VDM0|TIFA_BOVIN TRAF-interacting protein with FHA domain-containing protein A OS=Bos taurus GN=TIFA PE=2 SV=1//1.67253e-30	UP	170.401	71.2414	1.2581	0.00022679	0.016895
CI01150223_00000950_00001522	antigen processing and regulators	CDK and related	>ref|XP_015457984.1| cyclin-dependent kinase-like 5 [Astyanax mexicanus]	sp|O76039|CDKL5_HUMAN Cyclin-dependent kinase-like 5 OS=Homo sapiens GN=CDKL5 PE=1 SV=1//1.8567e-58	UP	46.8542	8.49985	2.4627	4.0065e-06	0.00069696
CI01150231_00000389_00000762	antigen processing and regulators	CDK and related	>ref|XP_016086859.1| cyclin-dependent kinase-like 5, partial [Sinocyclocheilus grahami]	sp|Q3UTQ8|CDKL5_MOUSE Cyclin-dependent kinase-like 5 OS=Mus musculus GN=Cdkl5 PE=2 SV=1//1.83807e-52	UP	40.0072	8.11013	2.3025	3.106e-05	0.0036086
CI01000133_01271640_01272900	antigen processing and regulators	CDK and related	>ref|XP_016355887.1| cyclin-dependent kinase inhibitor 1B-like isoform X2 [Sinocyclocheilus anshuiensis] ref|XP_016355888.1|	sp|P38936|CDN1A_HUMAN Cyclin-dependent kinase inhibitor 1 OS=Homo sapiens GN=CDKN1A PE=1 SV=3//2.61074e-14	UP	55.2967	12.5908	2.1348	1.0737e-05	0.0015707
CI01000186_00156270_00161766	antigen processing and regulators	LRMP	>ref|XP_005168344.1| lymphoid-restricted membrane protein-like isoform X1 [Danio rerio] ref|XP_009294055.1|	sp|Q5RHB5|LRMP_DANRE Lymphoid-restricted membrane protein OS=Danio rerio GN=lrmp PE=1 SV=2//1.80571e-24	UP	174.246	28.3377	2.6203	5.4677e-12	6.0677e-09
CI01000350_01268618_01269611	complement system	C1q	>gb|KTG37462.1| hypothetical protein cypCar_00031512 [Cyprinus carpio]	sp|Q4ZJM9|C1QL4_MOUSE Complement C1q-like protein 4 OS=Mus musculus GN=C1ql4 PE=1 SV=1//5.21397e-17	UP	51627.8	6678.15	2.9506	1.829e-08	7.7448e-06
CI01000004_15836936_15841048	complement system	C1q	>ref|XP_016405451.1| cerebellin-2-like [Sinocyclocheilus rhinocerous]	sp|Q4ZJM9|C1QL4_MOUSE Complement C1q-like protein 4 OS=Mus musculus GN=C1ql4 PE=1 SV=1//9.15442e-09	UP	1181.14	244.259	2.2737	7.48e-10	5.0151e-07
CI01000304_09529802_09531061	complement system	C1q	>ref|XP_016383808.1| complement C1q-like protein 4 [Sinocyclocheilus rhinocerous]	sp|Q7Z5L3|C1QL2_HUMAN Complement C1q-like protein 2 OS=Homo sapiens GN=C1QL2 PE=2 SV=2//4.06311e-08	UP	3515.75	892.836	1.9774	4.8447e-09	2.3986e-06
CI01000181_00457762_00477931	complement system	C3	>ref|XP_016361987.1| complement C3-like [Sinocyclocheilus anshuiensis]	sp|P98093|CO3_ONCMY Complement C3 (Fragment) OS=Oncorhynchus mykiss GN=c3 PE=1 SV=1//0	UP	703.758	283.667	1.3109	0.00028235	0.01997
CI01158989_00000008_00000864	complement system	C3	>gb|AAQ74974.1| complement C3 [Ctenopharyngodon idella]	sp|P98093|CO3_ONCMY Complement C3 (Fragment) OS=Oncorhynchus mykiss GN=c3 PE=1 SV=1//2.05438e-59	UP	39771.5	16616.8	1.2591	1.8243e-05	0.0024161
CI01000181_00330804_00357644	complement system	C3	>gb|AAQ74974.1| complement C3 [Ctenopharyngodon idella]	sp|P98093|CO3_ONCMY Complement C3 (Fragment) OS=Oncorhynchus mykiss GN=c3 PE=1 SV=1//1.86581e-23	UP	273261	127340	1.1016	0.00015291	0.012333
CI01004566_00000214_00000565	complement system	C3	>gb|AAQ74974.1| complement C3 [Ctenopharyngodon idella]	sp|P98093|CO3_ONCMY Complement C3 (Fragment) OS=Oncorhynchus mykiss GN=c3 PE=1 SV=1//8.25009e-19	UP	25206.6	12190	1.0481	0.00034198	0.023401
CI01158956_00000114_00000473	complement system	C3	>gb|AAQ74974.1| complement C3 [Ctenopharyngodon idella]	sp|P98093|CO3_ONCMY Complement C3 (Fragment) OS=Oncorhynchus mykiss GN=c3 PE=1 SV=1//1.46412e-26	UP	24964.9	12095.1	1.0455	0.00030015	0.021045
CI01000016_06998707_07047702	complement system	C4	>ref|XP_016308228.1| complement C4-like [Sinocyclocheilus anshuiensis]	sp|P0C0L5|CO4B_HUMAN Complement C4-B OS=Homo sapiens GN=C4B PE=1 SV=2//0	UP	119891	56108.9	1.0954	0.00013487	0.011187
CI01000092_04458178_04481575	complement system	CFB	>gb|AFD18593.1| Bf/C2B [Ctenopharyngodon idella]	sp|P04186|CFAB_MOUSE Complement factor B OS=Mus musculus GN=Cfb PE=1 SV=2//1.55357e-116	UP	19423.4	8680.55	1.1619	5.9687e-05	0.0060629
CI01000030_05519604_05542781	complement system	CFH	>ref|XP_016100433.1| complement factor H-like [Sinocyclocheilus grahami]	sp|P08603|CFAH_HUMAN Complement factor H OS=Homo sapiens GN=CFH PE=1 SV=4//8.68789e-07	UP	6987.69	2824.51	1.3068	5.7567e-06	0.00092631
CI01150997_00000056_00000242	complement system	CFI	>gb|ADN22949.1| complement factor I [Ctenopharyngodon idella]	sp|P05156|CFAI_HUMAN Complement factor I OS=Homo sapiens GN=CFI PE=1 SV=2//1.19617e-13	UP	12697.4	5926.87	1.0992	0.00016705	0.013072
CI01161994_00000124_00001384	inflammatory cytokines and receptors	CCL	>ref|XP_016395761.1| C-C motif chemokine 20-like [Sinocyclocheilus rhinocerous]	-//-	UP	38.9357	0	Inf	1.625e-06	0.00034633
CI01000132_00031324_00038969	inflammatory cytokines and receptors	CRELD	>ref|XP_016356093.1| cysteine-rich with EGF-like domain protein 2 isoform X3 [Sinocyclocheilus anshuiensis]	sp|Q7SXF6|CREL2_DANRE Cysteine-rich with EGF-like domain protein 2 OS=Danio rerio GN=creld2 PE=2 SV=2//4.05342e-08	UP	181.208	67.4811	1.4251	0.0003643	0.024388
CI01000001_05436238_05437581	inflammatory cytokines and receptors	FAM	>ref|XP_016320611.1| protein FAM110A-like [Sinocyclocheilus anshuiensis] ref|XP_016320612.1|	sp|Q4QRD7|F110B_DANRE Protein FAM110B OS=Danio rerio GN=fam110b PE=2 SV=1//8.01701e-21	UP	207.329	66.7465	1.6352	0.00055457	0.034027
CI01000021_02495559_02501217	inflammatory cytokines and receptors	FAM	>ref|XP_016364556.1| uncharacterized protein LOC107705678 [Sinocyclocheilus rhinocerous] ref|XP_016364557.1|	sp|Q9NTX9|F217B_HUMAN Protein FAM217B OS=Homo sapiens GN=FAM217B PE=2 SV=1//1.21252e-17	UP	153.756	65.8455	1.2235	0.00067885	0.039577
CI01000009_03235111_03242103	inflammatory cytokines and receptors	ILDR	>ref|XP_016144083.1| immunoglobulin-like domain-containing receptor 1 [Sinocyclocheilus grahami] ref|XP_016144084.1|	sp|Q32NM7|ILDR1_XENLA Immunoglobulin-like domain-containing receptor 1 OS=Xenopus laevis GN=ildr1 PE=2 SV=1//5.90453e-87	UP	421.311	196.486	1.1005	0.0004387	0.028233
CI01180000_00390297_00422803	inflammatory cytokines and receptors	integrin alpha	>ref|XP_016400389.1| integrin alpha-9 [Sinocyclocheilus rhinocerous]	sp|Q13797|ITA9_HUMAN Integrin alpha-9 OS=Homo sapiens GN=ITGA9 PE=1 SV=2//0	UP	539.377	257.071	1.0691	0.00071416	0.040826
CI01000338_00032989_00048218	inflammatory cytokines and receptors	LIFR	>ref|XP_016140152.1| leukemia inhibitory factor receptor-like [Sinocyclocheilus grahami]	sp|P42702|LIFR_HUMAN Leukemia inhibitory factor receptor OS=Homo sapiens GN=LIFR PE=1 SV=1//2.0987e-54	UP	3357.78	1450.35	1.2111	5.6418e-05	0.0058569
CI01000113_02479865_02481505	inflammatory cytokines and receptors	NFIL3	>ref|XP_016300227.1| nuclear factor interleukin-3-regulated protein-like [Sinocyclocheilus anshuiensis]	sp|Q5FW38|NFIL3_XENTR Nuclear factor interleukin-3-regulated protein OS=Xenopus tropicalis GN=nfil3 PE=2 SV=1//4.8274e-37	UP	591.31	163.762	1.8523	3.4228e-05	0.0038832
CI01000046_03606941_03615212	innate immune cells related	MMD	>ref|XP_016418383.1| monocyte to macrophage differentiation factor 2-like isoform X1 [Sinocyclocheilus rhinocerous]	sp|Q8R189|PAQRA_MOUSE Monocyte to macrophage differentiation factor 2 OS=Mus musculus GN=Mmd2 PE=2 SV=1//1.07286e-127	UP	161.395	60.0124	1.4273	4.4927e-05	0.0048356
CI01000255_00208007_00210331	other genes related to immune response	GIAMP	>ref|XP_009297299.1| GTPase IMAP family member 8-like [Danio rerio]	sp|Q75N62|GIMA8_MOUSE GTPase IMAP family member 8 OS=Mus musculus GN=Gimap8 PE=2 SV=1//1.86397e-37	UP	30.3314	0	Inf	0.0008259	0.045357
CI01000069_00000091_00001650	other genes related to immune response	HSP	>gb|ADX32514.1| heat shock 70 kDa protein [Ctenopharyngodon idella]	sp|Q9I8F9|HSP71_ORYLA Heat shock 70 kDa protein 1 OS=Oryzias latipes PE=3 SV=1//0	UP	187.923	11.9669	3.973	0.000485	0.030605
CI01000030_10971452_10974167	other genes related to immune response	myeloid cell related	>ref|XP_016392937.1| myeloid-derived growth factor-like [Sinocyclocheilus rhinocerous]	sp|Q9CPT4|MYDGF_MOUSE Myeloid-derived growth factor OS=Mus musculus GN=Mydgf PE=1 SV=1//6.11655e-40	UP	361.042	108.479	1.7348	1.2808e-07	4.0723e-05
CI01000001_00580789_00602408	other genes related to immune response	oncogene	>ref|XP_016426987.1| proto-oncogene tyrosine-protein kinase Src-like isoform X2 [Sinocyclocheilus rhinocerous]	sp|Q1JPZ3|SRC_DANRE Proto-oncogene tyrosine-protein kinase Src OS=Danio rerio GN=src PE=1 SV=2//0	UP	239.435	106.186	1.173	0.00034322	0.023401
CI01000046_01047300_01066367	other genes related to immune response	ubiquitin ligase	>ref|XP_016361454.1| putative E3 ubiquitin-protein ligase UNKL isoform X1 [Sinocyclocheilus anshuiensis]	sp|Q5FWH2|UNKL_MOUSE Putative E3 ubiquitin-protein ligase UNKL OS=Mus musculus GN=Unkl PE=2 SV=2//1.24823e-11	UP	276.839	131.765	1.0711	0.00085042	0.046544
CI01000000_10407402_10409508	other genes related to immune response	ubiquitin related	>gb|KTG35016.1| hypothetical protein cypCar_00003411 [Cyprinus carpio]	sp|O95164|UBL3_HUMAN Ubiquitin-like protein 3 OS=Homo sapiens GN=UBL3 PE=1 SV=1//1.34965e-36	UP	750.303	305.364	1.2969	2.4533e-05	0.0030157
CI01000053_05302453_05304313	pattern recognition	C-type lectin	>ref|XP_016424779.1| C-type lectin domain family 4 member E-like [Sinocyclocheilus rhinocerous] ref|XP_016424780.1|	sp|Q9ULY5|CLC4E_HUMAN C-type lectin domain family 4 member E OS=Homo sapiens GN=CLEC4E PE=1 SV=1//3.05809e-24	UP	4003.85	1800.33	1.1531	0.00013199	0.011033
CI01000127_01764767_01770711	pattern recognition	HMG	>gb|KTG33108.1| hypothetical protein cypCar_00017874, partial [Cyprinus carpio]	sp|O60381|HBP1_HUMAN HMG box-containing protein 1 OS=Homo sapiens GN=HBP1 PE=1 SV=2//4.78071e-172	UP	561.225	268.261	1.0649	0.00055174	0.03395
CI01000346_01031315_01042333	pattern recognition	LRR-containing proteins	>ref|XP_016105865.1| leucine-rich repeat and fibronectin type-III domain-containing protein 4-like isoform X1 [Sinocyclocheilus grahami]	sp|Q8BXA0|LRFN5_MOUSE Leucine-rich repeat and fibronectin type-III domain-containing protein 5 OS=Mus musculus GN=Lrfn5 PE=1 SV=1//0	UP	22.0124	2.38098	3.2087	8.617e-05	0.0081085
CI01000039_07523213_07573865	pattern recognition	LRR-containing proteins	>ref|XP_009299962.1| leucine-rich repeat and calponin homology domain-containing protein 2 isoform X2 [Danio rerio]	sp|Q5VUJ6|LRCH2_HUMAN Leucine-rich repeat and calponin homology domain-containing protein 2 OS=Homo sapiens GN=LRCH2 PE=2 SV=2//0	UP	100.736	36.4615	1.4661	0.00011917	0.010146
CI01000015_06462740_06468269	pattern recognition	LRR-containing proteins	>ref|XP_016379967.1| leucine-rich repeat protein SHOC-2 [Sinocyclocheilus rhinocerous] ref|XP_016379968.1|	sp|Q1L8Y7|SHOC2_DANRE Leucine-rich repeat protein SHOC-2 OS=Danio rerio GN=shoc2 PE=2 SV=1//0	UP	262.47	113.258	1.2125	0.00016191	0.012865
CI01000080_04371959_04376923	pattern recognition	LRR-containing proteins	>ref|XP_016309932.1| F-box/LRR-repeat protein 3-like [Sinocyclocheilus anshuiensis]	sp|Q9UKT7|FBXL3_HUMAN F-box/LRR-repeat protein 3 OS=Homo sapiens GN=FBXL3 PE=1 SV=1//0	UP	364.768	165.671	1.1387	0.00032222	0.022348
CI01000027_01843365_01850501	T/B cell antigen activation	BCR	>ref|XP_016313687.1| B-cell receptor CD22-like isoform X1 [Sinocyclocheilus anshuiensis]	sp|P20273|CD22_HUMAN B-cell receptor CD22 OS=Homo sapiens GN=CD22 PE=1 SV=2//4.87042e-21	UP	35.2775	9.11013	1.9532	0.00070537	0.040464
CI01000030_07158026_07159540	T/B cell antigen activation	TMIGD	>ref|XP_016138150.1| transmembrane and immunoglobulin domain-containing protein 1-like [Sinocyclocheilus grahami]	-//-	UP	147.703	65.4495	1.1742	0.0007347	0.041481

## Sheet: liver 7w vs 5w down
Gene ID	immune Process	Immune gene categery	Blasted with NR	Blasted with SWISS PROT	State	readcount_liv_4	readcount_liv_3	log2FoldChange	pval	padj
CI01000012_12691707_12693855	adapters effectors and signal transducers	Programmed cell death protein	>ref|XP_016326633.1| programmed cell death protein 2-like [Sinocyclocheilus anshuiensis]	sp|Q2YDC9|PDCD2_BOVIN Programmed cell death protein 2 OS=Bos taurus GN=PDCD2 PE=2 SV=1//2.15508e-108	DOWN	30.6046	90.3402	-1.5616	8.9779e-05	0.0083747
CI01000012_05523886_05527548	adapters effectors and signal transducers	CD276	>ref|XP_016407631.1| programmed cell death 1 ligand 1-like [Sinocyclocheilus rhinocerous]	sp|Q5ZPR3|CD276_HUMAN CD276 antigen OS=Homo sapiens GN=CD276 PE=1 SV=1//6.69438e-17	DOWN	29.6666	115.031	-1.9551	0.00057706	0.034908
CI01000016_05124385_05128589	antigen processing and regulators	CDC	>gb|KTG36064.1| hypothetical protein cypCar_00023158 [Cyprinus carpio]	sp|P0C2X8|CDCA3_XENLA Cell division cycle-associated protein 3 OS=Xenopus laevis GN=cdca3 PE=1 SV=1//2.6668e-09	DOWN	14.0634	173.461	-3.6246	0.00089501	0.048086
CI01000004_04406215_04410740	antigen processing and regulators	CDC	>ref|XP_016398963.1| cell division cycle protein 20 homolog [Sinocyclocheilus rhinocerous]	sp|Q9JJ66|CDC20_MOUSE Cell division cycle protein 20 homolog OS=Mus musculus GN=Cdc20 PE=1 SV=2//0	DOWN	20.6645	316.783	-3.9383	3.0749e-05	0.0036071
CI01000012_05124400_05129545	antigen processing and regulators	CDK and related	>ref|XP_016335332.1| cyclin-dependent kinase inhibitor 3 [Sinocyclocheilus anshuiensis]	sp|Q810P3|CDKN3_MOUSE Cyclin-dependent kinase inhibitor 3 OS=Mus musculus GN=Cdkn3 PE=2 SV=1//1.60153e-24	DOWN	31.4724	173.662	-2.4641	0.00016494	0.01301
CI01000030_04225211_04225930	antigen processing and regulators	CDK and related	>ref|XP_016356132.1| cyclin-dependent kinases regulatory subunit 1-like [Sinocyclocheilus anshuiensis] ref|XP_016356133.1|	sp|P56390|CKS2_MOUSE Cyclin-dependent kinases regulatory subunit 2 OS=Mus musculus GN=Cks2 PE=3 SV=1//3.50109e-28	DOWN	6.60111	60.9033	-3.2057	0.00034298	0.023401
CI01105190_00001351_00005052	complement system	C1q	>ref|XP_016401779.1| complement component 1 Q subcomponent-binding protein, mitochondrial-like isoform X1 [Sinocyclocheilus rhinocerous] ref|XP_016401780.1|	sp|Q3T0B6|C1QBP_BOVIN Complement component 1 Q subcomponent-binding protein, mitochondrial OS=Bos taurus GN=C1QBP PE=2 SV=1//2.86156e-93	DOWN	304.32	703.095	-1.2081	9.0202e-05	0.0083899
CI01000006_07223113_07228278	complement system	C7	>gb|AEQ53931.1| complement component C7 [Ctenopharyngodon idella] gb|AFN20333.1|	sp|Q29RQ1|CO7_BOVIN Complement component C7 OS=Bos taurus GN=C7 PE=2 SV=1//0	DOWN	8736.55	22236	-1.3478	2.203e-06	0.00042709
CI01000327_04060107_04065015	inflammatory cytokines and receptors	ACRs	>ref|XP_016345517.1| atypical chemokine receptor 4-like [Sinocyclocheilus anshuiensis]	sp|P35350|ACKR4_BOVIN Atypical chemokine receptor 4 OS=Bos taurus GN=ACKR4 PE=2 SV=1//2.24557e-79	DOWN	772.841	2050.96	-1.4081	0.00024649	0.017947
CI01000082_03890139_03903991	inflammatory cytokines and receptors	EGF,EGFR and related	>ref|XP_016398451.1| epidermal growth factor receptor-like [Sinocyclocheilus rhinocerous]	sp|P13388|XMRK_XIPMA Melanoma receptor tyrosine-protein kinase OS=Xiphophorus maculatus GN=xmrk PE=2 SV=2//0	DOWN	113.191	296.886	-1.3911	0.00069351	0.040069
CI01000018_04243337_04245807	inflammatory cytokines and receptors	FAM	>ref|XP_016400068.1| protein FAM162B-like [Sinocyclocheilus rhinocerous]	sp|A3KP48|F162B_DANRE Protein FAM162B OS=Danio rerio GN=fam162b PE=2 SV=1//1.13178e-56	DOWN	377.335	875.265	-1.2139	3.4268e-05	0.0038832
CI01000306_03018466_03023859	inflammatory cytokines and receptors	FAM	>ref|XP_016393258.1| protein FAM83D-like [Sinocyclocheilus rhinocerous]	sp|A4QP72|FA83D_DANRE Protein FAM83D OS=Danio rerio GN=fam83d PE=2 SV=1//0	DOWN	4.7208	77.7437	-4.0416	0.00070289	0.040464
CI01000073_00709882_00719515	inflammatory cytokines and receptors	GVIN	>ref|XP_016374721.1| LOW QUALITY PROTEIN: up-regulator of cell proliferation [Sinocyclocheilus rhinocerous]	sp|Q7Z2Y8|GVIN1_HUMAN Interferon-induced very large GTPase 1 OS=Homo sapiens GN=GVINP1 PE=2 SV=2//0	DOWN	99.025	435.95	-2.1383	1.901e-05	0.0024722
CI01000173_00285596_00297618	innate immune cells related	MMD	>ref|XP_016351188.1| monocyte to macrophage differentiation factor-like isoform X2 [Sinocyclocheilus anshuiensis]	sp|Q15546|PAQRB_HUMAN Monocyte to macrophage differentiation factor OS=Homo sapiens GN=MMD PE=2 SV=2//7.11306e-124	DOWN	328.297	1061.38	-1.6929	1.5466e-05	0.0021362
CI01000026_10347872_10351783	other genes related to immune response	CEBP	>gb|KTG31918.1| hypothetical protein cypCar_00001286, partial [Cyprinus carpio]	sp|P49715|CEBPA_HUMAN CCAAT/enhancer-binding protein alpha OS=Homo sapiens GN=CEBPA PE=1 SV=3//5.95908e-69	DOWN	897.07	3741.19	-2.0602	6.6476e-09	3.193e-06
CI01073640_00000168_00002660	other genes related to immune response	GIAMP	>ref|XP_016395547.1| GTPase IMAP family member 8-like [Sinocyclocheilus rhinocerous]	sp|Q9UG22|GIMA2_HUMAN GTPase IMAP family member 2 OS=Homo sapiens GN=GIMAP2 PE=1 SV=2//9.4023e-11	DOWN	40.1335	122.392	-1.6086	0.00042304	0.027448
CI01000009_01981245_01988092	other genes related to immune response	HSP	>gb|ADU34083.1| 60 kDa heat shock protein [Ctenopharyngodon idella]	sp|Q5ZL72|CH60_CHICK 60 kDa heat shock protein, mitochondrial OS=Gallus gallus GN=HSPD1 PE=1 SV=1//0	DOWN	785.979	1755.71	-1.1595	7.175e-05	0.006976
CI01000352_00558495_00562831	other genes related to immune response	HSP	>gb|KTG40668.1| hypothetical protein cypCar_00030446 [Cyprinus carpio]	sp|P63018|HSP7C_RAT Heat shock cognate 71 kDa protein OS=Rattus norvegicus GN=Hspa8 PE=1 SV=1//0	DOWN	259.877	936.43	-1.8493	1.3393e-09	8.1325e-07
CI01000319_03162184_03166209	other genes related to immune response	ubiquitin ligase	>ref|XP_016317886.1| small integral membrane protein 13-like [Sinocyclocheilus anshuiensis] ref|XP_016317887.1|	sp|Q14258|TRI25_HUMAN E3 ubiquitin/ISG15 ligase TRIM25 OS=Homo sapiens GN=TRIM25 PE=1 SV=2//9.9837e-29	DOWN	697.306	1878.2	-1.4295	4.0086e-05	0.0044501
CI01000319_03180932_03187841	other genes related to immune response	ubiquitin ligase	>ref|XP_016313640.1| pyrin-like isoform X2 [Sinocyclocheilus anshuiensis]	sp|P19474|RO52_HUMAN E3 ubiquitin-protein ligase TRIM21 OS=Homo sapiens GN=TRIM21 PE=1 SV=1//1.92795e-17	DOWN	10.4574	108.174	-3.3708	0.00017468	0.013546
CI01000139_00820957_00824698	other genes related to immune response	ubiquitin related	>ref|XP_016322337.1| ubiquitin-associated protein 1-like isoform X1 [Sinocyclocheilus anshuiensis]	sp|F5GYI3|UBA1L_HUMAN Ubiquitin-associated protein 1-like OS=Homo sapiens GN=UBAP1L PE=2 SV=1//2.21292e-39	DOWN	15.0937	68.8741	-2.19	2.0863e-05	0.0026856
CI01000300_08558046_08560329	other genes related to immune response	ubiquitin related	>ref|XP_006796249.1| ubiquitin carboxyl-terminal hydrolase isozyme L1-like [Neolamprologus brichardi]	sp|Q00981|UCHL1_RAT Ubiquitin carboxyl-terminal hydrolase isozyme L1 OS=Rattus norvegicus GN=Uchl1 PE=1 SV=2//2.2778e-13	DOWN	9.43771	64.1942	-2.7659	0.00060143	0.03591
CI01000311_00349573_00358751	pattern recognition	galectin	>ref|XP_016365615.1| galectin-8-like [Sinocyclocheilus rhinocerous]	sp|O00214|LEG8_HUMAN Galectin-8 OS=Homo sapiens GN=LGALS8 PE=1 SV=4//4.04755e-94	DOWN	40.1057	122.079	-1.6059	2.4552e-05	0.0030157
CI01000310_04179073_04180084	pattern recognition	galectin	>gb|KTF88189.1| hypothetical protein cypCar_00008360 [Cyprinus carpio]	sp|P17931|LEG3_HUMAN Galectin-3 OS=Homo sapiens GN=LGALS3 PE=1 SV=5//4.40028e-33	DOWN	125.977	1377.92	-3.4513	4.6302e-26	4.967e-22
CI01000233_00038176_00041967	T/B cell antigen activation	MAL	>ref|XP_016430401.1| protein MAL2-like isoform X1 [Sinocyclocheilus rhinocerous]	sp|A2VE13|MAL2_BOVIN Protein MAL2 OS=Bos taurus GN=MAL2 PE=1 SV=1//1.51558e-50	DOWN	129.779	334.005	-1.3638	2.1173e-05	0.0027146
CI01000344_00598734_00637342	T/B cell antigen activation	RGS	>ref|XP_016398659.1| regulator of G-protein signaling 12-like [Sinocyclocheilus rhinocerous]	sp|Q8CGE9|RGS12_MOUSE Regulator of G-protein signaling 12 OS=Mus musculus GN=Rgs12 PE=1 SV=2//2.51647e-91	DOWN	11.6284	49.5933	-2.0925	0.00059637	0.035674
CI01180000_07403482_07412752	T/B cell antigen activation	HELLS	>gb|KTG04276.1| hypothetical protein cypCar_00039843 [Cyprinus carpio]	sp|Q9NRZ9|HELLS_HUMAN Lymphoid-specific helicase OS=Homo sapiens GN=HELLS PE=1 SV=1//0	DOWN	22.6015	123.846	-2.4541	1.7751e-09	1.0201e-06
